1 A novel glucocorticoid and androgen receptor modulator reduces viral  
2 entry and innate immune inflammatory responses in the Syrian Hamster  
3 model of SARS-CoV-2

4  
5 Savannah M. Rocha<sup>1,2</sup>, Anna C. Fagre<sup>1</sup>, Amanda S. Latham<sup>1,2</sup>, Katriana A. Popichak<sup>1</sup>, Casey P.  
6 McDermott<sup>2</sup>, Clinton C. Dawson<sup>1</sup>, Jason E. Cummings<sup>1</sup>, Juliette Lewis<sup>1</sup>, Philip Reigan<sup>3</sup>, Tawfik A.  
7 Aboellail<sup>1</sup>, Rebekah C. Kading<sup>1</sup>, Tony Schountz<sup>1</sup>, Neil D. Theise<sup>4</sup>, Richard A. Slayden<sup>1\*</sup> and Ronald B.  
8 Tjalkens<sup>2\*</sup>

9  
10 <sup>1</sup> Department of Microbiology, Immunology and Pathology, College of Veterinary Medicine and  
11 Biomedical Sciences, Colorado State University, Fort Collins, CO, USA

12 <sup>2</sup> Department of Environmental and Radiological Health Sciences, College of Veterinary Medicine and  
13 Biomedical Sciences, Colorado State University, Fort Collins, CO, USA

14 <sup>3</sup> Skaggs School of Pharmacy and Pharmaceutical Sciences, University of Colorado Denver Anschutz  
15 Medical Campus, Denver, CO, USA

16 <sup>4</sup> Department of Pathology, New York University-Grossman School of Medicine, New York, NY

17

18 \*Corresponding Author:

19 Ronald B. Tjalkens  
20 Department of Environmental and  
21 Radiological Health Sciences  
22 College of Veterinary Medicine and  
23 Biomedical Sciences  
Colorado State University  
Fort Collins, CO 80523-1680  
Tel: +1 970 491 2825  
Fax: +1 970 491 7569  
[ron.tjalkens@colostate.edu](mailto:ron.tjalkens@colostate.edu)

Richard A. Slayden  
Department of Microbiology,  
Immunology and Pathology  
College of Veterinary Medicine and  
Biomedical Sciences  
Colorado State University  
Fort Collins, CO 80523-1682  
Tel: +1 970 491 2902  
Fax: +1 970 491 1815  
[richard.slayden@colostate.edu](mailto:richard.slayden@colostate.edu)

24  
25  
26  
27  
28  
29  
30  
31

**Running Title:** Anti-SARS-CoV-2 activity of a corticosteroid receptor inhibitor

**Keywords:** COVID19, SARS-CoV-2, glucocorticoid receptor, androgen receptor, innate immunity, inflammation, therapeutics

## 32 **Abstract**

33           Since its initial discovery in late 2019, severe acute respiratory syndrome coronavirus 2 (SARS-  
34 CoV-2), the cause of COVID19, has spread worldwide and despite significant research efforts, treatment  
35 options remain limited. Replication of SARS-CoV-2 in lung is associated with marked infiltration of  
36 macrophages and activation of innate immune inflammatory responses triggered, in part, by heightened  
37 production of interleukin-6 (IL-6) that recruits lymphocytes to the site of infection that amplify tissue injury.  
38 Antagonists of the glucocorticoid and androgen receptors have shown promise in experimental models of  
39 COVID19 and in clinical studies, because cell surface proteins required for viral entry, angiotensin  
40 converting enzyme 2 (ACE2) and the transmembrane serine protease 2 (TMPRSS2), are transcriptionally  
41 regulated by these receptors. We therefore postulated that the glucocorticoid (GR) and androgen receptor  
42 (AR) antagonist, PT150, would reduce infectivity of SARS-CoV-2 and prevent inflammatory lung injury  
43 in the Syrian golden hamster model of COVID19. Animals were infected intranasally with  $2.5 \times 10^4$   
44 TCID50/ml equivalents of SARS-CoV-2 (strain 2019-nCoV/USA-WA1/ 2020) and PT150 was  
45 administered by oral gavage at 30 and 100 mg/Kg/day for a total of 7 days. Animals were then examined  
46 at days 3, 5 and 7 post-infection (DPI) for lung histopathology, viral load and production of proteins  
47 regulating the initiation and progression of SARS-CoV-2 infection. Results of these studies indicated that  
48 oral administration of PT150 decreased replication of SARS-CoV-2 in lung, as well as expression of ACE2  
49 and TMPRSS2 protein. Hypercellularity and inflammatory cell infiltration driven by macrophage responses  
50 were dramatically decreased in PT150-treated animals, as was tissue damage and expression of IL-6.  
51 Molecular modeling suggested that PT150 binds to the co-activator interface of the ligand binding domain  
52 of both AR and GR and thereby acts as an allosteric modulator and transcriptional repressor of these  
53 receptors. Phylogenetic analysis of AR and GR across multiple species permissive to SARS-CoV-2  
54 infection revealed a high degree of sequence identity maintained across species, including human,  
55 suggesting that the mechanism of action and therapeutic efficacy observed in Syrian hamsters would likely  
56 be predictive of positive outcomes in patients. PT150 is therefore a strong candidate for further clinical  
57 development for the treatment of COVID19 across variants of SARS-CoV-2.

## 58 **Introduction**

59 Emerging in late December 2019 in Wuhan, China, several unidentified cases of severe pneumonia  
60 were reported of which were epidemiologically linked to a seafood and wet animal wholesale market.  
61 Through deep sequencing of lower respiratory samples from these patients, a novel betacoronavirus was  
62 identified [1, 2] and has since been distinguished as the initial point source of the biological threat that has  
63 now developed into a global pandemic. As of late 2020, severe acute respiratory syndrome coronavirus 2  
64 (SARS-CoV-2) has infected over 40 million people and has been responsible for over 1.14 million deaths  
65 [3] and continues to surge in many countries. The infection can be spread through respiratory droplet  
66 transmission from asymptomatic, pre-symptomatic, and symptomatic carriers [4] making diagnosis and  
67 quarantine efforts difficult, ultimately leading to increased propagation and dissemination of infectious  
68 virus.

69 Coronaviruses (Order: *Nidovirales*; Family: *Coronaviridae*) are enveloped, non-segmented,  
70 positive-sense single-stranded RNA viruses that contain very large genomes up to 33.5 kilobases (kb). The  
71 four subtypes (genera) of these viruses – alpha, beta, gamma, and delta-coronaviruses – share a highly  
72 conserved genome organization comprising a large replicase gene followed by structural and accessory  
73 genes. The organization of the coronavirus genome is organized from the 5'-leader-UTR, replicase,  
74 S(spike), E(envelope), M(membrane), N(nucleocapsid) to the 3' UTR poly (A) tail [5]. Notably, production  
75 of the spike protein has been linked to severity of disease. The spike protein is a proteolytically processed  
76 glycoprotein that extends from the viral membrane and modulates virus-cell membrane fusion. In order to  
77 acquire functionality, the protein must undergo multiple stepwise endoproteolytic cleavages [6]. The spike  
78 glycoprotein of SARS-CoV-2 has two domains, the S1 domain comprising residues 12 – 667 and the S2  
79 domain, comprising residues 668 -1273. The S1 subunit contains the receptor binding domain (RBD),  
80 which interacts with the ACE2 receptor, whereas the S2 subunit remains associated with the viral envelope  
81 [7]. Viral infection requires proteolytic cleavage at Arg685-Ser686 at the S1 site by the transmembrane  
82 protease, serine 2 (TMPRSS2), followed by cleavage at the S2 site at Arg815-Ser816 [6]. Proteolytic

83 cleavage of the spike protein then enables membrane fusion and entry into the host cell in complex with the  
84 ACE2 receptor [8].

85         Downregulating expression of ACE2 and TMPRSS2 has therefore emerged as an important  
86 therapeutic strategy for the treatment of COVID19 in order to increase host defense by preventing entry of  
87 SARS-CoV-2 into cells, thereby limiting viral replication. Clinical evidence supports this hypothesis, where  
88 a prospective study reported a decrease in the rate of intensive care unit admissions in men who had been  
89 prescribed anti-androgens for six months prior to hospitalization [9]. Both ACE2 and TMPRSS2 are highly  
90 expressed in bronchiolar epithelial cells and transcriptionally regulated at the promoter level through the  
91 androgen receptor (AR) [8]. In a model of SARS-CoV-2 infection, inhibitors of AR transcriptional activity  
92 markedly reduced viral infectivity and decreased inflammatory lung injury in experimental animals [8].  
93 Both ACE2 and TMPRSS2 are also significantly regulated by inflammation. ACE2, as well as the  
94 inflammatory cytokine interleukin-6 (IL-6), are non-canonical interferon-responsive genes (ISGs) that are  
95 highly expressed following infection with SARS-CoV-2 [10]. Inflammation also directly upregulates  
96 expression of TMPRSS2 [11]. Steroids have therefore been extensively used to treat COVID19 patients,  
97 albeit with mixed results. A recent study in *The Lancet* indicated that clinical evidence does not support  
98 corticosteroid treatment for SARS-CoV-2-related lung injury. Patients who were given corticosteroids were  
99 more likely to require mechanical ventilation, vasopressors, and renal replacement therapy [12].  
100 Corticosteroids such as dexamethasone have been shown to increase expression of ACE2 [13, 14], which  
101 would enhance viral entry and replication and could therefore worsen infection when given too early.  
102 Dexamethasone also modestly increased expression of TMPRSS2 in these studies, which could likewise  
103 potentially enhance membrane fusion and vesicular uptake of SARS-CoV-2. Neither hydrocortisone nor  
104 prednisolone were able to decrease expression of TMPRSS2 [13]. Thus, better therapeutics are needed that  
105 can modulate these receptor systems to downregulate expression of proteins critical to viral entry.

106         During viral RNA synthesis, both genomic and sub-genomic RNAs are produced that serve as  
107 mRNAs for the structural and accessory proteins that are downstream of viral replicase proteins [5]. SARS-  
108 CoV-2 contains up to seven stem-loop regulatory sequences in the 5'-UTR that that are thought to control

109 stages of RNA synthesis and may confer species specificity for virulence [5, 15]. In part because a number  
110 of human RNA viruses have glucocorticoid receptor *cis*-acting elements in their 5-UTR's, antagonists of  
111 the glucocorticoid receptor are one potential class of drugs for therapeutic modulation of SARS-CoV-2  
112 infection. A report comparing the host inflammatory response to SARS-CoV (SARS1) and HCoV-EMC  
113 (MERS) revealed a unique set of 207 genes dysregulated during the course of infection. Based on these  
114 data, the authors predicted that selected kinase inhibitors and glucocorticoid receptor modulators could  
115 function as potential antiviral compounds [16]. These studies suggested two important points about  
116 modulating infection with human coronaviruses: 1) targeting cellular responses has been shown to inhibit  
117 viral replication and 2) immunomodulatory drugs that reduce the excessive host inflammatory response to  
118 respiratory viruses have therapeutic benefit, as seen with influenza virus infections [16].

119         However, classical antagonists of glucocorticoid function that compete for interaction at the steroid  
120 binding pocket of the receptor ligand binding domain (LBD) could be problematic, due to excessive  
121 blockade of cortisol function. Thus, allosteric modulators of both AR and GR that could dampen  
122 transcriptional activation through these receptors would be preferable. Such interactions tend to favor  
123 stabilization of transcriptional co-repressor proteins on chromatin, such as CoREST, HDAC2/3/4 and  
124 NCoR2, that prevent binding of co-activator proteins in response to activation of *cis*-acting transcription  
125 factors [17, 18]. To address the potential for a transcriptional modulator to protect against SARS-CoV-2  
126 infection through downregulation of AR/GR-dependent expression of ACE2 and TMPRSS2, we examined  
127 the therapeutic efficacy of (11 $\beta$ ,17 $\beta$ )-11-(1,3-benzodioxol-5-yl)-17-hydroxy-17-(1-propynyl)-estra-4,9-  
128 dien-3-one (designated as "PT150"), a synthetic AR and GR modulator shown to antagonize human GR  
129 [19, 20]. In a screening study conducted by the National Institute of Allergy and Infectious Diseases, PT150  
130 had broad inhibitory activity towards several RNA viruses, including influenza, Zika virus and  $\beta$ -  
131 coronaviruses, and was recently shown to have direct anti-viral effects against SARS-CoV-2 in human  
132 bronchiolar epithelial cells *in vitro* [21]. Based on these data, and on previous host-pathogen interaction  
133 studies, we postulated that PT150 would be an effective inhibitor of SARS-CoV-2 infection *in vivo* in the  
134 Syrian golden hamster model of COVID19. The results of this study demonstrate that PT150 given orally

- 135 once daily for 7 days prevented replication of SARS-CoV-2 in lung, decreased infiltration of macrophages,  
136 improved lung pathology and reduced expression of both ACE2 and TMPRSS2.

## 137 **Materials and Methods**

### 138 *Virus and cell culture procedures*

139 SARS-CoV-2 strain 2019-nCoV/USA-WA1/2020 was obtained from BEI Resources and  
140 propagated on Vero cells (ATCC CCL-81, American Type Culture Collection) at 37°C with 5% CO<sub>2</sub>. Virus  
141 titrations from animal tissues were performed by plaque assay as described previously [21]. Plaques were  
142 visualized two days post inoculation following fixation with 10% formalin for 30 minutes, and addition of  
143 0.25% crystal violet solution in 20% ethanol.

144

### 145 *Animal procedures*

146 All animal protocols were approved by the Institutional Animal Use Committee at Colorado State  
147 University (IACUC Protocol No. 996), hamsters were handled in compliance with the PHS Policy and  
148 Guide for the Care and Use of Laboratory Animals and procedures were performed in accordance with  
149 National Institutes of Health guidelines. Male and female Syrian hamsters were used in studies at 8 weeks  
150 of age (N=60, Charles River Laboratory). The animals were housed in the CSU animal facility and allowed  
151 access to standard pelleted feed and water *ad libitum* prior to being moved to the Biosafety Level 3  
152 containment facility for experimental infection. Hamsters were anesthetized by inhalation with isoflurane  
153 and then intranasally inoculated with  $2.5 \times 10^4$  TCID<sub>50</sub>/ml equivalents of SARS-CoV-2 (strain 2019-  
154 nCoV/USA-WA1/2020) in sterile Dulbecco's Modified Eagles Medium (DMEM). Hamsters not receiving  
155 SARS-CoV-2 were given a sham inoculation with the equivalent volume of DMEM vehicle. To assess  
156 activity of PT150 (supplied by Palisades Therapeutics/Pop Test Oncology LLC) against SARS-CoV-2,  
157 experimental groups (N=6 animals per group at each timepoint) were as follows: control (sham inoculation  
158 + miglyol vehicle), SARS-CoV-2 + miglyol, SARS-CoV-2 + 30 mg/Kg PT150, SARS-CoV-2 + 100 mg/Kg  
159 PT150. The experimental drug (PT150) was dissolved in 100% miglyol 812 and delivered by oral gavage  
160 at 8 µL/gm body weight under isoflurane anesthesia. Animals were weighed daily to deliver an accurate  
161 dose of drug. The SARS-CoV-2 + vehicle group also received miglyol 812 by oral gavage. Animals were  
162 observed for clinical symptomology at time of dosing each day (lethargy, ruffled fur, hunched back posture,



163 nasolacrimal discharge, and rapid breathing). Groups of animals were terminated at 3, 5 and 7 days post-  
164 infection (DPI). Eighteen hamsters (6 SARS-CoV-2 + vehicle, 6 SARS-CoV-2 + 30 mg/Kg PT150; 6  
165 SARS-CoV-2 + 100mg/Kg PT150) were euthanized at 3 and 5 DPI. On day 7 post-infection (7 DPI) the  
166 remaining 24 hamsters were euthanized (6 DMEM + miglyol; 6 SARS-CoV-2 + vehicle, 6 SARS-CoV-2  
167 + 30 mg/Kg PT150; 6 SARS-CoV-2 + 100mg/Kg PT150). Animals were terminated by decapitation under  
168 isoflurane anesthesia and tissue was collected for immunohistochemistry, viral isolation, RNA analysis and  
169 histopathology.

170

### 171 *Histopathology*

172 Lungs from 60 hamsters were extirpated *en bloc* and fixed whole in 10% neutral buffered formalin under  
173 Biosafety Level 3 (BSL-3) containment for at least 72 hours before being transferred to CSU Veterinary  
174 Diagnostic Laboratory, BSL-2 necropsy area for tissue trimming and sectioning. Four transverse whole-  
175 lung sections were stained with hematoxylin and eosin (H&E). Tissue was sectioned at 5µm thickness and  
176 were mounted onto poly-ionic slides. Sections were then deparaffinized and immunostained using the Leica  
177 RX<sup>m</sup> automated robotic staining system. Antigen retrieval was performed by using Bond Epitope Retrieval  
178 Solutions 1 and 2 for 20 minutes each in conjunction with base plate heat application. Sections were then  
179 permeabilized (0.1% Triton X in 1X TBS) and blocked with 1% donkey serum. Primary antibodies were  
180 diluted to their optimized dilutions in tris-buffered saline and incubated on the tissue for 1 hour/antibody:  
181 Rabbit SARS nucleocapsid protein (SARS-CoV-2; Rockland; 1:500), goat ionized calcium binding adaptor  
182 molecule 1 (IBA1; Abcam; 1:50), goat angiotensin converting enzyme 2 (ACE2; R&D Systems; 1:500),  
183 rabbit transmembrane serine protease 2 (TMPRSS2; Abcam; 1:500), mouse interleukin 6 (IL-6;  
184 ThermoFisher; 1:500). Sections were then stained for DAPI (Sigma) and were mounted on glass coverslips  
185 using ProLong Gold Anti-Fade medium and stored at 4°C until imaging.

186

187

188

189 *Immunofluorescence Imaging and Protein Quantification*

190 The studies described here were conducted by a single investigator. Images were captured using an  
191 automated stage Olympus BX63 fluorescent microscope equipped with a Hamamatsu ORCA-flash 4.0 LT  
192 CCD camera and collected using Olympus CellSens software. Quantification of protein was performed by  
193 acquiring five randomized images encompassing the pseudostratified columnar epithelium around bronchi  
194 at 400x magnification (Olympus X-Apochromat air objective; N.A. 0.95) all from different lung lobes.  
195 Regions of interest were then drawn to enclose the epithelial layer and exclude the lumen, in order to  
196 accurately obtain average intensity measurements. The Count and Measure function on Olympus CellSens  
197 software was then used to threshold the entirety of the ROI and measure the given channel signal.  
198 Quantification of invading inflammatory cells was performed by generating whole lung montages by  
199 compiling 100x images acquired using automated stage coordinate mapping with an Olympus 10X air  
200 objective (0.40 N.A.) All images were obtained and analyzed under the same conditions for magnification,  
201 exposure time, lamp intensity, camera gain, and filter application. ROIs were drawn around the lung  
202 sections and the co-localization function of Count and Measure within Olympus CellSens software was  
203 applied the sections. IBA1+ cells were determined per 1mm<sup>2</sup> areas given the previously drawn ROI overall  
204 area.

205

206 *Quantification of Inflammatory Cell Infiltration and Consolidation*

207 Quantification of the total affected pulmonary parenchyma as well as counting of inflammatory  
208 cells per area (region of interest, ROI, 1mm<sup>2</sup>) was determined in hematoxylin and eosin (H&E) -  
209 stained histological sections by digital image analysis. A digital montage was compiled at 100X  
210 magnification using an Olympus X-Apochromat 10X air objective (N.A. 0.40) consisting of  
211 approximately 1,200 individual frames per lung lobe. Affected regions of interest (ROI's) were  
212 subsequently automatically identified using Olympus CellSens software by quantifying whole-

213 lung montages scanned from each hamster for total number of nuclei or nucleated cells (to exclude  
214 erythrocytes) stained with H&E, relative to the total area of the ROI for each lung.

215

### 216 *Computational-based Modeling*

217 PT150 was docked into the crystal structures of the ligand-binding domain of the androgen receptor (PDB:  
218 2PIT) [22], and the glucocorticoid receptor (PDB: 3CLD) [23], using the Glide module within Schrödinger  
219 (Release 2020-2, Schrödinger LLC, New York, NY) [24-26]. Prior to docking, the water molecules were  
220 removed, and the proteins were prepared by assigning bond orders, adding hydrogens, and repairing any  
221 side chains or missing amino acid sequences. To complete protein preparation a restrained minimization of  
222 the protein structure was performed using the default constraint of 0.30Å RMSD and the OPLS\_2005 force  
223 field [27]. The prepared proteins were subjected to SiteMap analysis [26], that identified the available  
224 binding sites in the ligand binding domains of the androgen and glucocorticoid receptors and docking grids  
225 were generated using Receptor Grid Generation. PT150 prepared using LigPrep by generating possible  
226 states at the target pH 7.0 using Epik and minimized by applying the OPLS\_2005 force field [27].  
227 Molecular docking simulations were performed targeting each potential binding site for PT150 using the  
228 Glide ligand docking module in XP (extra precision) mode and included post-docking minimization [25].

229

### 230 *Phylogenetic Analysis and Similarity Score Representation*

231 Phylogenetic analysis was performed by investigating protein coding sequences across multiple species  
232 within the protein of interest. FASTA files were downloaded from National Center for Biotechnology  
233 Institute's (NCBI) gene databases and were then input into Molecular Evolutionary Genetic Analysis  
234 (MEGAX, v.10.1.8) software for alignment. Muscle alignment was performed, and a neighbor-joining  
235 phylogenetic tree was constructed. Similarity scores between species were generated by utilizing the  
236 Basic Local Alignment Search Tool for protein-protein comparison on the National Center for  
237 Biotechnology Information interface.

238 **Results**

239

240 *Clinical observations and levels of SARS-CoV-2 in the lungs of Syrian hamsters treated with PT150.* Oral  
241 gavage with PT150 or vehicle began on the same day as infection with  $2.5 \times 10^4$  TCID<sub>50</sub> SARS-CoV-2  
242 (USA-WA1-2020 strain) by intranasal inoculation. Body weights were monitored daily for each animal,  
243 with a noted decline in average body weight in each experimental group that reached a maximum loss by  
244 day 5 with a total overall loss of eight-percent body weight (**Fig 1A,B**). This finding is consistent with other  
245 longitudinal studies in Syrian golden hamsters infected with SARS-CoV-2 that demonstrate the maximal  
246 clinical severity of disease at day 5 post-infection [28, 29]. Infected hamsters treated with vehicle-only  
247 showed the greatest decline in body weight relative to controls, that was prevented by treatment with PT150  
248 at 30 and 100 mg/Kg/day (**Fig 1A**). Two-way ANOVA analysis indicated a difference with treatment  
249 ( $p < 0.0007$ ,  $F(3,92) = 6.231$ ) and time post-infection ( $p < 0.0001$ ,  $F(7,92) = 16.39$ ). Hamsters treated with  
250 PT150 at 30 and 100 mg/Kg/day did not show a statistically significant difference in body weight from  
251 control hamsters at day 5 post-infection, at which the maximal extent of body weight loss is observed in  
252 Syrian hamsters infected with SARS-CoV-2 and treated with vehicle only (**Fig 1B**). Hamsters challenged  
253 with SARS-CoV-2 showed marked lethargy, ataxia, ruffled fur, altered posture and overall decreased  
254 movement and exploratory behavior, clinical signs and behaviors that were observably less pronounced in  
255 hamsters treated with 30 mg/Kg/day PT150. Infected hamsters treated with 100 mg/Kg/day PT150  
256 displayed clinical behavior largely indistinguishable from uninfected control animals.

257

258 *Lung histology.* Paraffin-embedded lung sections were stained with hematoxylin and eosin (H&E) and  
259 examined by a veterinary pathologist blinded to the treatment groups. Representative lung sections from  
260 each experimental group are presented in **Figure 2**. In hamsters infected with SARS-CoV-2, affected  
261 portions of lungs showed marked histiocytic/neutrophilic broncho-interstitial pneumonia with hyperplasia  
262 of pneumocyte type II and formation of both bronchiolar and alveolar syncytial cells (**Fig 2A-C**, low power  
263 images and high magnification insets). Inflammation equally involved main branches of the pulmonary

264 artery, where infiltrating macrophages were observed dissecting the tunica media and lifting the tunica  
265 intima, with clustering of circulating monocytes along hypertrophied, apoptotic and occasionally  
266 hyperplastic endothelial lining cells. Lungs from vehicle-treated infected hamsters show approximately  
267 70% destruction of pulmonary parenchyma by an intense mixed inflammatory infiltrate with marked  
268 expansion of alveolar interstitium, as well as peri-bronchial inflammation and arteritis of large pulmonary  
269 vessels. Of note, peri-bronchial inflammation and arteritis of a large pulmonary vessel was observed (**Fig**  
270 **2B**). High power images (**Fig 2B,C**, insets) of the bronchiolar wall show inflammatory cells comprising  
271 macrophages and neutrophils dissecting through bronchiolar muscular wall with similar infiltration of  
272 several rows of monocytes/macrophages lifting the tunica intima and dissecting the tunica media. By 7 DPI,  
273 infected animals treated with vehicle-only (**Fig 2C**) had less inflammation, with clearing of luminal  
274 infiltrates in smaller bronchioles. High power images show reduced clustering of monocytes/macrophages  
275 in pulmonary arteries with lingering inflammation in medium-sized bronchioles and parenchymal  
276 consolidation. Treatment with PT150 at 30 mg/Kg/day (**Fig 2D-F**) and 100 mg/Kg/day (**Fig 2G-I**)  
277 alleviated the extent of inflammation in main stem bronchi and respiratory bronchioles, as well as in  
278 medium-sized pulmonary arteries. The percentage of normal to affected parenchyma showing significant  
279 resolution was markedly increased in PT150-treated animals, particularly in the 100 mg/Kg/day group, even  
280 at the peak of inflammatory infiltration by 5 DPI (**Fig 2H**, low and high-power images). In the 100  
281 mg/Kg/day treatment group, there was near complete resolution within the parenchyma by 7 DPI (**Fig 2I**,  
282 low and high-power images), relative to untreated animals infected with SARS-CoV-2, which showed  
283 significant consolidation and loss of parenchymal structure by 7 DPI (**Fig 2C**, low and high-power images).  
284 In addition, the number of apoptotic endothelial cells in pulmonary bronchi was greatly reduced by  
285 treatment with 100 mg/Kg/day PT150 (**Fig 2G-I**, high magnification insets). In hamsters treated with 100  
286 mg/Kg/day PT150, there was a marked reduction in the inflammatory response within bronchioles,  
287 interstitium and arteries, with almost complete resolution of bronchiolar inflammation and reduced  
288 clustering of circulating monocytes to a marginating single row. No medial dissection is observed in these

289 vessels. The overall paradigm for treatment and isolation of tissues for analysis of viral load, gene  
290 expression and histopathology is depicted in the diagram in **Fig 2J**.

291  
292 *Analysis of immune cell infiltration and broncho-interstitial pneumonia in lung tissue of animals exposed*  
293 *to SARS-CoV-2.* Lungs were examined for the extent of immune cell infiltration at 3, 5 and 7 days post-  
294 infection (DPI) by quantitative digital image analysis (**Fig 3**). Whole mount sections of paraffin-embedded  
295 lung tissue were stained with H&E and bright field grayscale images were collected using a microscope  
296 equipped with a scanning motorized stage. Pseudo-colored H&E images are depicted in blue, overlaid with  
297 ROIs detected by intensity thresholding in red. Hematoxylin-positive immune cell soma were rendered as  
298 focal points within the regions of interest to calculate the percent hypercellularity of tissue following  
299 infection with SARS-CoV-2. By 3 DPI, lung tissue showed significant infiltration of immune cells in the  
300 SARS-CoV-2 + vehicle group in addition to widespread hemorrhaging (**Fig 3A**). Immune cell infiltration  
301 was decreased in dose-dependent fashion by treatment with PT150 at 30 and 100 mg/Kg/day (**Fig 3D-F,**  
302 **G-I**). Uninfected control hamsters treated with vehicle-only, displayed minimal levels of macrophage  
303 hypercellularity with clear bronchi and open parenchyma and an absence of inflammatory infiltrate (**Fig**  
304 **3J**). The percent of total lung area displaying immune cell hypercellularity was quantified by ROI  
305 thresholding and normalizing to the total lung section area (**Fig 3K**). This effectively showed the post-  
306 infection response mediated by immune-cell infiltration. There was a time-dependent increase in cellular  
307 reactivity, tissue pathology and bronchio-interstitial pneumonia. The peak of cellular infiltration occurred  
308 at the 7-day timepoint revealing progressive consolidation. These affects are decreases with the  
309 administration of PT150 at the 30mg/Kg/day dose as well as the 100mg/Kg/day dose.

310  
311 *Phylogenetic analysis and molecular docking with the androgen and glucocorticoid receptors.* Because  
312 expression of TMPRSS2 and ACE2R are regulated through the andro-corticosteroid signaling pathway [7,  
313 11, 30], we examined the genetic sequence identity of the glucocorticoid and androgen receptors across  
314 multiple species associated with propagation of SARS-CoV-2 (**Fig 4**). Comparing sequences of the

315 androgen receptor (**Fig 4A**) indicated a high degree of identity between all species analyzed, with sequence  
316 concordance values with the human gene ranging from 84.62 (golden hamster) and 85.47 (greater horseshoe  
317 bat) to 98.26 (sunda pangolin). Similarly, sequence concordance values with the human gene for the  
318 glucocorticoid receptor (**Fig 4B**) ranged from 89.96 (golden hamster) and 90.89 (greater horseshoe bat) to  
319 95.00 (sunda pangolin). Sequence similarity between these genes amongst difference species is relevant for  
320 both potential zoonotic propagation of SARS-CoV-2 as well as to the testing of potential therapeutic  
321 compounds acting through the androgen and glucocorticoid receptors.

322 PT150 was docked into the crystal structures of the ligand-binding domain of the androgen receptor  
323 (PDB: 2PIT) and the glucocorticoid receptor (PDB: 3CLD), using the Glide module within Schrödinger  
324 (Release 2020-2, Schrödinger LLC, New York, NY) [9-11]. For the androgen receptor (**Fig 4C,D**), the  
325 PDB: 2PIT structure was selected due to the 1.76Å resolution and good coverage of the ligand binding  
326 domain of the androgen receptor (251 residues). PT150 showed optimal binding to the peptide activator  
327 allosteric site on the androgen receptor but did not dock into the steroid binding site identified for  
328 dihydrotestosterone. For the glucocorticoid receptor, the PDB: 3CLD was selected due to the 2.84Å  
329 resolution, limited other available structures and good coverage of the ligand binding domain of the  
330 glucocorticoid receptor (259 residues). Similar to the analysis of the androgen receptor, PT150  
331 preferentially bound to the co-activator peptide allosteric binding site of the glucocorticoid receptor (**Fig**  
332 **4E,F**). No anchoring interactions were observed for the steroid binding pocket.

333  
334 *ACE2 and TMPRSS2 production and regulation in animals infected with SARS-CoV-2.* The ACE2 receptor  
335 and the cell surface TMPRSS2 serine protease are required for viral binding and S-protein priming to  
336 facilitate entry of SARS-CoV-2 into cells. We therefore examined production of these proteins in lung  
337 tissue from infected hamsters with and without PT150 treatment. ACE2 intensity measurements were  
338 quantified by immunofluorescence imaging (**Fig 5**), where pseudostratified columnar epithelium lining  
339 bronchioles showed marked decreases in ACE2 production relative to vehicle control (**Fig 5J**) with the  
340 administration of 100mg/kg/day of PT150 at the 3-day timepoint as well as the 7-day timepoint (**Fig 5G-I**,



341 **K**). Decreased ACE2 production was also observed in the 30mg/kg/day PT150 lung sections at 7DPI (**Fig**  
342 **5F**). Production of ACE2 in vehicle-treated SARS-CoV-2 lung sections were similar to control until the 7-  
343 day timepoint, at which point production reached a maximum (**Fig 5A-C**). Expression of TMPRSS2 within  
344 bronchiolar cells was increased in the untreated lung sections infected with SARS-CoV-2 (**Fig 6A-C, K**),  
345 indicating induction associated with enhanced levels of viral entry, replication and dissemination. In  
346 contrast, the 100mg/kg/day PT150 treated animals showed significant decreases in TMPRSS2 protein  
347 levels at all timepoints (**Fig 6G-I**) similar to levels observed in the control group (**Fig 6J-K**). There was  
348 also reduction in TMPRSS2 proteins levels within the 30 mg/kg/day treatment groups at 5DPI and 7DPI  
349 (**Fig 6D-F, K**), similar to levels in control animals at 7DPI.

350

351 *Inflammatory activation of macrophages and release of interleukin-6 is decreased by PT150 treatment in*  
352 *Syrian hamsters infected with SARS-CoV-2 in parallel with decreased viral load.* The peak of infectivity  
353 and viral replication within the Syrian hamster model at sampled time points was observed at 3DPI. Using  
354 quantitative immunofluorescence scanning microscopy, we evaluated the extent of lung area containing  
355 both SARS-CoV-2 viral protein and infiltrating IBA1+ macrophages (**Fig 7**). In the SARS-CoV-2 + vehicle  
356 group, staining for viral nucleocapsid protein indicated the peak of viral protein production at 3DPI, which  
357 declined at both 5 and 7DPI (**Fig 7A-E**). Increased infiltration of macrophages was present at 3DPI, peaked  
358 at 5DPI and was then followed by a decline at 7DPI (**Fig 7A-E**). Control animals (**Fig 7S,T**) showed no  
359 staining for SARS-CoV-2 and only background levels of IBA1. Viral replication was decreased by  
360 administration of 30mg/kg/day of PT150 (**Fig 7G-L**), and was further decreased by the administration of  
361 100mg/kg/day of PT150 (**Fig 7M-R**). In parallel to the decrease in viral nucleocapsid protein, there was a  
362 decrease in the percent of total lung area occupied by infiltrating macrophages at 30 and 100 mg/Kg/day  
363 PT150 (**Fig 7G-L,M-R**). Quantification of immunofluorescence staining, as measured by the percent of  
364 total sampled lung area positive for SARS-CoV-2, revealed marked decreases in both percent lung area  
365 expressing viral replication, as well as the number of IBA1+ cells/mm<sup>2</sup> (**Fig 7U,V**). This demonstrates a



366 dose-response relationship in therapeutic efficacy of PT150 for reducing the viral burden of SARS-CoV-2  
367 in lung, as well as a corresponding decrease in the extent of infiltrating macrophages.

368 In Syrian golden hamsters infected with SARS-CoV-2, there was a significant increase in  
369 macrophage-derived IL-6 within the bronchiolar epithelial layer (**Fig 8A-C**). Immunofluorescence images  
370 of infected hamster lung tissue at 3DPI revealed cells within the bronchiolar epithelial layer co-producing  
371 high levels of IL-6 (green) with SARS-CoV-2 nucleocapsid protein (red). Nuclei were counterstained with  
372 DAPI (blue) and IBA1+ macrophages are shown in cyan. In infected animals, triple label  
373 immunofluorescence images show cells staining intensely for IL-6 and co-localizing with expression of  
374 SARS-CoV-2 nucleocapsids protein, adjacent to IBA1+ macrophages (**Fig 8A and inset**). Expression of  
375 IL-6 persisted at 5 and 7DPI, even after SARS-CoV-2 nucleocapsid protein was no longer evident (**Fig**  
376 **8B,C**). Treatment with PT150 and 30 mg/Kg/day (**Fig 8D-F**) and 100 mg/Kg/day (**Fig 8G-I**) dramatically  
377 decreased expression of IL-6, concordant with decreases in SARS-CoV-2 and in the presence of IBA1+  
378 macrophages. Quantification of fluorescence data indicated differences between PT150-treated groups and  
379 infected + vehicle groups at all timepoints (Treatment,  $p < 0.0001$ ,  $F(3,232) = 14.71$ ; Timepoint,  $p < 0.0001$ ,  
380  $F(2,232) = 29.99$ ), with the greatest differences evident at 3DPI, where both PT150-treated groups were  
381 different from the SARS-CoV-2 + vehicle group, as well as from each other, indicating dose-dependent  
382 effects on reduction of IL-6 in the bronchiolar epithelial layer of infected hamsters.

383

## 384 Discussion

385 Treatment options available for individuals that have SARS-CoV-2 continue to be limited. Of the  
386 few treatments that are available, many are the result of repurposing efforts and have low efficacy and  
387 limited experimental characterization about the direct mechanisms of action against SARS-CoV-2.  
388 Therapeutic approaches have primarily focused on targeting viral proteins [31-33] or the host immune  
389 response through corticosteroid administration, which can be detrimental if not administered during the  
390 correct period of the infection [34]. However, less research has been published on molecules that have both  
391 anti-viral activity as well as immunomodulatory activity to decrease the hyperinflammatory response to

392 SARS-CoV-2 infection. The mechanism of action of PT150 involves modulation of the glucocorticoid and  
393 androgen receptors that inhibits viral entry and replication by decreasing expression of two main proteins  
394 that the virus utilizes for endosomal uptake, TMPRSS2 and ACE2 [8, 35-40]. PT150 also modulates the  
395 immune response likely through the glucocorticoid receptor, which is expressed in numerous immune cells  
396 including macrophages, T cells, dendritic cells and epithelial cells [41, 42]. PT150 was administered orally  
397 to animals infected with SARS-CoV-2, resulting in marked clinical and pathological improvements when  
398 compared to the infected vehicle control group. Because Syrian hamsters can propagate human SARS-  
399 CoV-2 and show a high degree of sequence homology in both AR and GR (**Fig 4**), it is likely that SARS-  
400 CoV-2 infected patients will respond similarly to PT150 treatment.

401 Clinical symptoms of SARS-CoV-2 infection were observed in infected vehicle-only treated  
402 animals as early 3DPI. Behavioral and physical changes were more prominent at the 5-day timepoint and  
403 included labored breathing, ruffled fur, akinesia and maximal weight loss (5-10%). Weight loss observed  
404 5DPI similar to other studies in Syrian hamsters [43-46]. Animals that received PT150 at clinically relevant  
405 low (30mg/kg/day) and high (100mg/Kg/day) doses did not display as severe clinical manifestations and  
406 weight loss was minimal at the 5-day timepoint, when compared to untreated control animals (**Fig. 1**).  
407 Pathological analysis of infected lung tissue revealed inflammatory cellular infiltration involvement at  
408 3DPI, of which peaked at 5DPI and included mixed inflammatory cell populations resulting in  
409 bronchiointerstitial pneumonia (**Fig. 2**). The majority of the parenchymal space at the 5-day timepoint was  
410 reduced due to intense inflammatory cell infiltration and showed extravasating cells from pulmonary  
411 vessels being recruited to the epithelial layers of the bronchi. The multifocal inflammation began to resolve  
412 by 7DPI and was replaced with fibrotic lung tissue and consolidated areas of focal inflammation.  
413 Inflammatory pathology within the treated animals was decreased in severity and showed marked  
414 improvement within the parenchymal and alveolar spaces. High dose treatment tissue resembled that of  
415 control with open alveolar interfaces and non-inflamed vessels.

416 Digital image analysis of whole-lung scans in the infected vehicle-only group (**Fig 3**) showed  
417 extensive hypercellularity and bronchiointerstitial pneumonia, with markedly increased hypercellularity in

418 bronchioles, pulmonary arteries and the lung parenchyma. Lung hypercellularity in infected animals  
419 increased throughout the course of the 7-day study, similar to the progressive pneumonia experienced by  
420 SARS-CoV-2 patients in response to the overwhelming amount of edema and cellular infiltration into the  
421 parenchyma of the lungs. Treatment with PT150 markedly reduced hypercellularity at 5 and 7DPI, with the  
422 low-dose PT150 group showing reduction at 7DPI. This indicates that PT150 may be regulating cellular  
423 infiltration and recruitment into the lung tissue, resulting in reduced pathology and inflammation.

424 We performed phylogenetic analysis and molecular docking studies to characterize the putative  
425 molecular targets by which PT150 could modulate disease progression (**Fig 4**). Sequence concordance  
426 values for both AR and GR were very high across species representative of divergent taxonomic groups,  
427 including the greater horseshoe bat, sunda pangolin, Syrian golden hamster and human (amongst other  
428 species). This underscores not only the likely similar patterns of regulation of AR/GR-dependent genes  
429 across species that are required for entry of SARS-CoV-2, such as ACE2 and TMRSS2, but also the  
430 predictive potential for therapeutic modulation of these receptors using PT150, given the sequence  
431 similarity between the hamster and human genes. Similarity in these regulatory proteins also highlights the  
432 potential for cross-species transmission of SARS-CoV-2 and related  $\beta$ -coronaviruses and the importance  
433 of identifying compounds that can modulate signaling of AR and GR to increase host defense.

434 Molecular docking studies (**Fig 4C,D**) indicated likely interactions with the co-activator site of the  
435 ligand binding domain of both receptors (shaded in green), rather than the steroid binding pocket (shaded  
436 in magenta in each structure). Thus, PT150 may function as an allosteric modulator of these receptors,  
437 resulting in transcriptional repression of key genes, such as TMRPSS2 and ACE2 (required for viral entry),  
438 as well as pro-inflammatory factors. Modeling was conducted using the published crystal structures for AR  
439 (PDB: 2PIT) [22] and the glucocorticoid receptor (PDB: 3CLD), solved as a complex co-crystalized with  
440 fluticasone [23]. PT150 did not bind the steroid site in any simulation and although the binding site has  
441 some flexibility in both receptors, the stereochemistry of PT150 appears to hinder binding at this site. The  
442 co-activator peptide binding site most favorably interacted with PT150, suggesting this as a site of allosteric  
443 modulation that could inhibit transcriptional activity without directly competing for binding with

444 endogenous corticosteroid ligands. This has been reported for small molecule modulators of other nuclear  
445 receptors, such as NR4A2/Nurr1, where molecular docking studies indicated interactions at the co-activator  
446 peptide binding site than correlated with transcriptional inhibition of inflammatory gene expression [47].  
447 Studies published with the 1NHZ structure of GR co-crystalized with RU486 suggested potential  
448 interactions within the steroid binding pocket of the LBD [48], but the helix that forms part of both the  
449 steroid site and the co-activator peptide site was not complete in the 1NHZ structure due to a 9 amino acid  
450 deletion, resulting in a distortion of the GR LBD that would be more permissive of interactions within the  
451 steroid binding pocket. Thus, PT150 may modulate both AR and GR signaling as an allosteric inhibitor  
452 through interactions with the co-activator domain, leading to decreased transcription of target genes.

453 The doses of PT150 administered in the *in vivo* studies in hamsters are highly comparable to the  
454 calculated human doses in the proposed Phase II trial. Previous clinical steady-state exposure data in human  
455 trials with 500 mg PT150 would yield a dose of approximately 7 mg/Kg. Compared to both rodent and dog,  
456 human calculated exposures are significantly greater for a given dose, based on standard physiologic-based  
457 pharmacokinetic models that account for differences in mass, body surface area (BSA), metabolism, half-  
458 life, etc. [49]. Using scaling factors based on BSA (33), the doses used in the hamster study translate to a  
459 Human Equivalent Dose (HED) of:  $HED = 30 \text{ mg/kg} \times 5/37 = 4.1 \text{ mg/kg}$ ;  $HED = 100 \text{ mg/kg} \times 5/37 = 13.5$   
460  $\text{mg/kg}$ . Thus, 900 mg/day in patients would represent approximately 12.6 mg/Kg, which is very close to  
461 the efficacious dose observed in hamsters treated with PT150.

462  
463 To further investigate the molecular targets of PT150 *in vivo*, expression of ACE2 was determined  
464 in lung in bronchiolar epithelial cells (**Fig 5**). ACE2 levels in untreated animals remained constant until  
465 peaking at 7DPI. Co-localization of SARS-CoV-2 and ACE2 were observed in bronchiolar epithelial cells  
466 at 3DPI and 5DPI, supporting that ACE2 is a vital component in viral binding and entry (**Fig 5A-C**). This  
467 demonstrates that viral infectivity and replication may transcriptionally regulate ACE2 production in favor  
468 of viral propagation and survival. Treatment with 100 mg/Kg PT150 decreased the overall amount of ACE2  
469 in addition to reducing co-localization with SARS-CoV-2. This reduction of ACE2 could be due to

470 inhibition of androgen receptor binding to the promoter of *Ace2*, thereby decreasing transcriptional  
471 activation, as reported for other anti-androgens [50]. Expression of TMPRSS2 was also investigated due to  
472 the requirement of this cell surface serine protease for processing of the viral S1 spike protein that is  
473 necessary for viral entry in complex with ACE2 (**Fig 6**). Protein levels of TMPRSS2 in infected vehicle-  
474 only treated animals increased significantly at all timepoints, demonstrating transcriptional induction  
475 favoring viral replication. However, the low-dose PT150 treatment decreased TMPRSS2 expression at 5  
476 and 7DPI, whereas high-dose PT150 treatment decreased TMPRSS2 expression at all timepoints,  
477 demonstrating a dose-response effect in modulating expression of TMPRSS2 in lung. Decreased production  
478 of both TMPRSS2 and ACE2 suggests that PT150 is a transcriptional inhibitor of these genes that likely  
479 prevents binding of co-activator proteins to the enhancer regions of TMPRSS2 [51] as well as ACE2 [50].  
480 These data suggest that the anti-viral activity of PT150 is due to direct modulation of host defense that  
481 decreases viral entry points.

482 To determine if PT150 was effective at reducing overall viral replication, infection and immune  
483 responses, whole lung sections were analyzed and viral infectivity was determined by assessment of the  
484 SARS-CoV-2 nucleocapsid protein (**Fig 7**). In untreated animals, there was a significant change from  
485 control in the percentage of lung area infected with SARS-CoV-2 at 3DPI that decreased by 5DPI and 7DPI,  
486 as seen in previously published studies [44, 52, 53]. Viral loads in animals administered PT150 at 100  
487 mg/Kg were not different from control at 3DPI, demonstrating a dramatic reduction in viral attachment,  
488 replication and dissemination throughout lung tissue, both in the bronchi and in the parenchyma.  
489 Macrophage infiltration per area of tissue in untreated animals was increased at 3DPI and peaked at 5DPI,  
490 with resolution occurring at the 7-day timepoint. Animals treated with the high dose of PT150 showed  
491 significant decreases in invading macrophage populations at the 3-day timepoint and the low-dose PT150  
492 group showed decreases at 5DPI, demonstrating a marked reductions in the severity of inflammatory  
493 infiltration of macrophages.

494 IL-6 produced by activated macrophages is known to be a critical mediator of lung injury in  
495 COVID19 patients [54]. This cytokine is responsible for recruitment and activation of inflammatory cells

496 and is closely associated with the hyperimmune response observed in patients characterized by severe  
497 infiltration of macrophages and lymphocytes into lung tissue. IL-6 production was investigated in the  
498 bronchiolar cell layer to determine inflammatory recruitment potential during the course of disease (**Fig 8**).  
499 Infected animals treated with vehicle showed peak IL-6 production at the 3DPI timepoint, decreasing  
500 steadily to the 7-day timepoint. Interestingly, high and low dose PT150 treated groups showed highly  
501 reduced levels of IL-6 at all timepoints. This highlights the efficacy of PT150 in reducing innate immune  
502 responses concomitant to mitigating the severity of lung pathology in response to SARS-CoV-2.

503 In conclusion, these data demonstrate disease progression and pathology within the lungs of SARS-  
504 CoV-2-infected animals depends upon production of both ACE2 and TMPRSS2, which facilitate viral entry  
505 and replication, leading to recruitment of macrophages that initiate a severe innate immune response leading  
506 to broncho-interstitial pneumonia and consolidation of the lung parenchyma. Expression of IL-6 is  
507 necessary for recruitment of immune cells to the site of infection, which leads to the ‘cytokine storm’ and  
508 decreased prognosis for patients [55, 56]. PT150 treatment interrupts this progression of disease, limiting  
509 viral entry, thereby reducing viral loads and decreasing the severity of the immune response to SARS-CoV-  
510 2 infection. This may occur through allosteric inhibition of the androgen and glucocorticoid receptors,  
511 which decreases protein levels of ACE2 and TMPRSS2 and mitigates excessive immune responses through  
512 inhibition of inflammatory gene expression. Importantly, decreased production of IL-6 production by  
513 resident immune cells within the lung tissue is likely to correlate with an improve prognosis for patients.  
514 The novel mechanism of action of PT150 as both an inhibitor of viral entry and an immunomodulator makes  
515 it a strong candidate for therapeutic intervention in the treatment of COVID19 independent of SARS-CoV-  
516 2 variants.

517

518

519 **References**

- 520
- 521 1. Zhu, N., et al., *A Novel Coronavirus from Patients with Pneumonia in China, 2019*. N Engl J Med,  
522 2020. **382**(8): p. 727-733.
  - 523 2. Huang, C., et al., *Clinical features of patients infected with 2019 novel coronavirus in Wuhan,*  
524 *China*. Lancet, 2020. **395**(10223): p. 497-506.
  - 525 3. WHO, *Coronavirus disease (COVID-19) pandemic*. 2020.
  - 526 4. Wiersinga, W.J., et al., *Pathophysiology, Transmission, Diagnosis, and Treatment of Coronavirus*  
527 *Disease 2019 (COVID-19): A Review*. JAMA, 2020. **324**(8): p. 782-793.
  - 528 5. Fehr, A.R. and S. Perlman, *Coronaviruses: an overview of their replication and pathogenesis*.  
529 *Methods Mol Biol*, 2015. **1282**: p. 1-23.
  - 530 6. Belouzard, S., V.C. Chu, and G.R. Whittaker, *Activation of the SARS coronavirus spike protein via*  
531 *sequential proteolytic cleavage at two distinct sites*. Proc Natl Acad Sci U S A, 2009. **106**(14): p.  
532 5871-6.
  - 533 7. Fuentes-Prior, P., *Priming of SARS-CoV-2 S protein by several membrane-bound serine*  
534 *proteinases could explain enhanced viral infectivity and systemic COVID-19 infection*. J Biol  
535 Chem, 2020.
  - 536 8. Qiao, Y., et al., *Targeting transcriptional regulation of SARS-CoV-2 entry factors ACE2 and*  
537 *TMPRSS2*. Proc Natl Acad Sci U S A, 2020.
  - 538 9. Goren, A., et al., *Anti-androgens may protect against severe COVID-19 outcomes: results from a*  
539 *prospective cohort study of 77 hospitalized men*. J Eur Acad Dermatol Venereol, 2020.
  - 540 10. Sang, E.R., et al., *Epigenetic Evolution of ACE2 and IL-6 Genes: Non-Canonical Interferon-*  
541 *Stimulated Genes Correlate to COVID-19 Susceptibility in Vertebrates*. Genes (Basel), 2021.  
542 **12**(2).
  - 543 11. Wang, M., et al., *Distinct expression of SARS-CoV-2 receptor ACE2 correlates with endotypes of*  
544 *chronic rhinosinusitis with nasal polyps*. Allergy, 2020.
  - 545 12. Russell, C.D., J.E. Millar, and J.K. Baillie, *Clinical evidence does not support corticosteroid*  
546 *treatment for 2019-nCoV lung injury*. Lancet, 2020. **395**(10223): p. 473-475.
  - 547 13. Saheb Sharif-Askari, N., et al., *Effect of Common Medications on the Expression of SARS-CoV-2*  
548 *Entry Receptors in Kidney Tissue*. Clin Transl Sci, 2020. **13**(6): p. 1048-1054.
  - 549 14. Sinha, S., et al., *In vitro and in vivo identification of clinically approved drugs that modify ACE2*  
550 *expression*. Mol Syst Biol, 2020. **16**(7): p. e9628.
  - 551 15. Guan, B.J., H.Y. Wu, and D.A. Brian, *An optimal cis-replication stem-loop IV in the 5' untranslated*  
552 *region of the mouse coronavirus genome extends 16 nucleotides into open reading frame 1*. J Virol,  
553 2011. **85**(11): p. 5593-605.
  - 554 16. Josset, L., et al., *Cell host response to infection with novel human coronavirus EMC predicts*  
555 *potential antivirals and important differences with SARS coronavirus*. mBio, 2013. **4**(3): p. e00165-  
556 13.
  - 557 17. Glass, C.K. and K. Saijo, *Nuclear receptor transrepression pathways that regulate inflammation*  
558 *in macrophages and T cells*. Nat Rev Immunol, 2010. **10**(5): p. 365-76.
  - 559 18. Shaked, I., et al., *Transcription factor Nr4a1 couples sympathetic and inflammatory cues in CNS-*  
560 *recruited macrophages to limit neuroinflammation*. Nat Immunol, 2015. **16**(12): p. 1228-34.



- 561 19. Peeters, B.W., et al., *Glucocorticoid receptor antagonists: new tools to investigate disorders*  
562 *characterized by cortisol hypersecretion*. *Stress*, 2004. **7**(4): p. 233-41.
- 563 20. Rice, B.A., et al., *Repeated subcutaneous administration of PT150 has dose-dependent effects on*  
564 *sign tracking in male Japanese quail*. *Exp Clin Psychopharmacol*, 2019. **27**(6): p. 515-521.
- 565 21. Theise, N.D., et al., *Clinical stage molecule PT150 is a modulator of glucocorticoid and androgen*  
566 *receptors with antiviral activity against SARS-CoV-2*. *Cell Cycle*, 2020. **19**(24): p. 3632-3638.
- 567 22. Estebanez-Perpina, E., et al., *A surface on the androgen receptor that allosterically regulates*  
568 *coactivator binding*. *Proc Natl Acad Sci U S A*, 2007. **104**(41): p. 16074-9.
- 569 23. Biggadike, K., et al., *X-ray crystal structure of the novel enhanced-affinity glucocorticoid agonist*  
570 *fluticasone furoate in the glucocorticoid receptor-ligand binding domain*. *J Med Chem*, 2008.  
571 **51**(12): p. 3349-52.
- 572 24. Friesner, R.A., et al., *Glide: a new approach for rapid, accurate docking and scoring. I. Method*  
573 *and assessment of docking accuracy*. *J Med Chem*, 2004. **47**(7): p. 1739-49.
- 574 25. Friesner, R.A., et al., *Extra precision glide: docking and scoring incorporating a model of*  
575 *hydrophobic enclosure for protein-ligand complexes*. *J Med Chem*, 2006. **49**(21): p. 6177-96.
- 576 26. Halgren, T.A., *Identifying and characterizing binding sites and assessing druggability*. *J Chem Inf*  
577 *Model*, 2009. **49**(2): p. 377-89.
- 578 27. Beckstein, O., A. Fourier, and B.I. Iorga, *Prediction of hydration free energies for the SAMPL4*  
579 *diverse set of compounds using molecular dynamics simulations with the OPLS-AA force field*. *J*  
580 *Comput Aided Mol Des*, 2014. **28**(3): p. 265-76.
- 581 28. Chan, J.F., et al., *Simulation of the Clinical and Pathological Manifestations of Coronavirus*  
582 *Disease 2019 (COVID-19) in a Golden Syrian Hamster Model: Implications for Disease*  
583 *Pathogenesis and Transmissibility*. *Clin Infect Dis*, 2020. **71**(9): p. 2428-2446.
- 584 29. Imai, M., et al., *Syrian hamsters as a small animal model for SARS-CoV-2 infection and*  
585 *countermeasure development*. *Proc Natl Acad Sci U S A*, 2020. **117**(28): p. 16587-16595.
- 586 30. Young, M.J., C.D. Clyne, and K.E. Chapman, *Endocrine aspects of ACE2 regulation: RAAS,*  
587 *steroid hormones and SARS-CoV-2*. *J Endocrinol*, 2020. **247**(2): p. R45-R62.
- 588 31. Cascella, M., et al., *Features, Evaluation, and Treatment of Coronavirus*, in *StatPearls*. 2020:  
589 Treasure Island (FL).
- 590 32. Asselah, T., et al., *COVID-19: Discovery, diagnostics and drug development*. *J Hepatol*, 2021.  
591 **74**(1): p. 168-184.
- 592 33. Campos, D.M.O., et al., *SARS-CoV-2 virus infection: Targets and antiviral pharmacological*  
593 *strategies*. *J Evid Based Med*, 2020. **13**(4): p. 255-260.
- 594 34. Li, H., et al., *Impact of corticosteroid therapy on outcomes of persons with SARS-CoV-2, SARS-*  
595 *CoV, or MERS-CoV infection: a systematic review and meta-analysis*. *Leukemia*, 2020. **34**(6): p.  
596 1503-1511.
- 597 35. Hoffmann, M., et al., *SARS-CoV-2 Cell Entry Depends on ACE2 and TMPRSS2 and Is Blocked by*  
598 *a Clinically Proven Protease Inhibitor*. *Cell*, 2020. **181**(2): p. 271-280 e8.
- 599 36. Sungnak, W., et al., *SARS-CoV-2 entry factors are highly expressed in nasal epithelial cells*  
600 *together with innate immune genes*. *Nat Med*, 2020. **26**(5): p. 681-687.
- 601 37. Lukassen, S., et al., *SARS-CoV-2 receptor ACE2 and TMPRSS2 are primarily expressed in*  
602 *bronchial transient secretory cells*. *EMBO J*, 2020. **39**(10): p. e105114.



- 603 38. Ragia, G. and V.G. Manolopoulos, *Inhibition of SARS-CoV-2 entry through the ACE2/TMPRSS2*  
604 *pathway: a promising approach for uncovering early COVID-19 drug therapies*. Eur J Clin  
605 Pharmacol, 2020. **76**(12): p. 1623-1630.
- 606 39. Bourgonje, A.R., et al., *Angiotensin-converting enzyme 2 (ACE2), SARS-CoV-2 and the*  
607 *pathophysiology of coronavirus disease 2019 (COVID-19)*. J Pathol, 2020. **251**(3): p. 228-248.
- 608 40. Ali, A. and R. Vijayan, *Dynamics of the ACE2-SARS-CoV-2/SARS-CoV spike protein interface*  
609 *reveal unique mechanisms*. Sci Rep, 2020. **10**(1): p. 14214.
- 610 41. Baschant, U. and J. Tuckermann, *The role of the glucocorticoid receptor in inflammation and*  
611 *immunity*. J Steroid Biochem Mol Biol, 2010. **120**(2-3): p. 69-75.
- 612 42. Necela, B.M. and J.A. Cidlowski, *Mechanisms of glucocorticoid receptor action in*  
613 *noninflammatory and inflammatory cells*. Proc Am Thorac Soc, 2004. **1**(3): p. 239-46.
- 614 43. Sia, S.F., et al., *Pathogenesis and transmission of SARS-CoV-2 in golden hamsters*. Nature, 2020.  
615 **583**(7818): p. 834-838.
- 616 44. Rosenke, K., et al., *Defining the Syrian hamster as a highly susceptible preclinical model for SARS-*  
617 *CoV-2 infection*. bioRxiv, 2020.
- 618 45. Lee, A.C., et al., *Oral SARS-CoV-2 Inoculation Establishes Subclinical Respiratory Infection with*  
619 *Virus Shedding in Golden Syrian Hamsters*. Cell Rep Med, 2020. **1**(7): p. 100121.
- 620 46. Brocato, R.L., et al., *Disruption of Adaptive Immunity Enhances Disease in SARS-CoV-2 Infected*  
621 *Syrian Hamsters*. J Virol, 2020.
- 622 47. Popichak, K.A., et al., *Compensatory Expression of Nur77 and Nurr1 Regulates NF-kappaB-*  
623 *Dependent Inflammatory Signaling in Astrocytes*. Mol Pharmacol, 2018. **94**(4): p. 1174-1186.
- 624 48. Kauppi, B., et al., *The three-dimensional structures of antagonistic and agonistic forms of the*  
625 *glucocorticoid receptor ligand-binding domain: RU-486 induces a transconformation that leads to*  
626 *active antagonism*. J Biol Chem, 2003. **278**(25): p. 22748-54.
- 627 49. Reagan-Shaw, S., M. Nihal, and N. Ahmad, *Dose translation from animal to human studies*  
628 *revisited*. FASEB J, 2008. **22**(3): p. 659-61.
- 629 50. Deng, Q., et al., *Targeting androgen receptor regulation of TMPRSS2 and ACE2 as a therapeutic*  
630 *strategy to combat CoVID-19* 2021.
- 631 51. Martinez-Ariza, G. and C. Hulme, *Recent advances in allosteric androgen receptor inhibitors for*  
632 *the potential treatment of castration-resistant prostate cancer*. Pharm Pat Anal, 2015. **4**(5): p. 387-  
633 402.
- 634 52. Osterrieder, N., et al., *Age-Dependent Progression of SARS-CoV-2 Infection in Syrian Hamsters*.  
635 Viruses, 2020. **12**(7).
- 636 53. Roberts, A., et al., *Severe acute respiratory syndrome coronavirus infection of golden Syrian*  
637 *hamsters*. J Virol, 2005. **79**(1): p. 503-11.
- 638 54. Stasi, C., et al., *Treatment for COVID-19: An overview*. Eur J Pharmacol, 2020. **889**: p. 173644.
- 639 55. Hojyo, S., et al., *How COVID-19 induces cytokine storm with high mortality*. Inflamm Regen, 2020.  
640 **40**: p. 37.
- 641 56. Tang, L., et al., *Controlling Cytokine Storm Is Vital in COVID-19*. Front Immunol, 2020. **11**: p.  
642 570993.
- 643

644 **Figure Legends**

645

646 **Figure 1. Clinical observations in Syrian hamsters infected with SARS-CoV-2. A)** Time course of body  
647 weights for all groups plotted as percent change from baseline for each animal. Two-way ANOVA analysis  
648 indicated significance for both Time ( $p < 0.0001$ ,  $F(7, 92) = 16.39$ ) and Treatment condition ( $p = 0.0007$ ,  $F$   
649  $*3, 92) = 6.231$ ). Maximal loss of body weight was observed by five days post-infection. **B)** Body weights  
650 were directly compared between groups at 5 days post-infection. Significant differences were detected  
651 between the control and SARS-CoV-2 groups, as well as between SARS-CoV-2 + 30 mg/Kg PT150. The  
652 SARS-CoV-2 + 100 mg/Kg PT150 group was not different from the SARS-CoV-2 + vehicle group, but  
653 was also not different from control. Groups were compared by one-way ANOVA using Tukey's post hoc  
654 test.  $*p < 0.05$ ,  $**p < 0.01$ .  $N = 6$  animals per group.

655

656 **Figure 2. PT150 protects against adverse histopathological outcomes in the lungs of Syrian hamsters**  
657 **infected with SARS-CoV-2.** Hamsters were infected by intranasal inoculation with  $2.5 \times 10^4$  TCID<sub>50</sub>/ml  
658 equivalents of SARS-CoV-2 (strain 2019-nCoV/USA-WA1/ 2020) and lung tissue was stained with  
659 hematoxylin and eosin (H&E) for examination of pathological changes on days 3, 5 and 7 post-infection.  
660 Treatment groups were **(A-C)** SARS-CoV-2 + vehicle, **(D-F)**, SARS-CoV-2 + 30 mg/Kg/day PT150, **(G-**  
661 **I)** SARS-CoV-2 + 100 mg/Kg/day PT150 and **(J)** Control + vehicle.  $N = 6$  animals per group. Images were  
662 collected at 100X overall magnification (large image panels) or 400X overall magnification (inset panels).  
663 **(K)** Study timeline and schematic for treatments and analysis of viral titers, host and viral RNA and  
664 histopathology.

665

666 **Figure 3. Reduction of immune cell infiltration and broncho-interstitial pneumonia by PT150**  
667 **treatment.** Overall hypercellularity within lung tissue, resulting in pathological broncho-interstitial  
668 pneumonia, was determined using ROI delineations on hematoxylin and eosin-stained sections for all  
669 groups: days 3, 5 and 7 post-infection. **A-C**, SARS-CoV-2 + vehicle; **D-F**, SARS-CoV-2 + 30 mg/Kg/day

670 PT150; **G-I**, SARS-CoV-2 + 100 mg/Kg/day PT150; **B**, Control + vehicle. **K**, Quantification of the total  
671 area of the lung tissue affected with broncho-interstitial pneumonia was conducted using automated focal  
672 point determination within ROIs following manual thresholding. Pseudo colored grayscale images of H&E  
673 sections are depicted in blue, overlaid with ROI's detected by intensity thresholding in red. (\*\*\*\* $p < 0.0001$ ;  
674  $N=6$  hamsters/group)

675

676 **Figure 4. Phylogenetic analysis and molecular docking of PT150 with the androgen and**  
677 **glucocorticoid receptor.** Phylogenetic analysis of the androgen receptor (**A**) and glucocorticoid receptor  
678 (**B**) indicate a high degree of homology across species, including between human and hamster, indicating  
679 that the hamster is an appropriate predictive model to test the protective effects of PT150 against SARS-  
680 CoV-2 via modulation of these receptors. The putative binding site on the androgen (**C**) and glucocorticoid  
681 (**D**) receptors was analyzed by computer modeling studies using the human receptor.

682

683 **Figure 5. PT150 treatment decreases expression of the ACE2 receptor in lung.** In Syrian golden  
684 hamsters infected with SARS-CoV-2, there was a modest decrease in expression of the ACE2R in  
685 bronchiolar epithelial cells at day 7 post-infection in animals given PT150 at 100 mg/Kg/day. Experimental  
686 groups were (A-C) SARS-CoV-2 + vehicle, (D-F), SARS-CoV-2 + 30 mg/Kg/day PT150, (G-I) SARS-  
687 CoV-2 + 100 mg/Kg/day PT150, (J) Control + vehicle. **K**, Quantification of ACE2R expression in lung  
688 tissue. \* $p < 0.05$

689

690 **Figure 6. PT150 administration decreases overall TMPRSS2 expression in bronchiolar epithelial**  
691 **cells.** In Syrian golden hamsters infected with SARS-CoV-2, there was a significant decrease in expression  
692 of the TMPRSS2 in bronchiolar epithelial cells at all timepoints in animals given PT150 at 30 and 100  
693 mg/Kg/day. Experimental groups were (A-C) SARS-CoV-2 + vehicle, (D-F), SARS-CoV-2 + 30  
694 mg/Kg/day PT150, (G-I) SARS-CoV-2 + 100 mg/Kg/day PT150, (J) Control + vehicle. **K**, Quantification  
695 of TMPRSS2 protein expression in lung tissue. \* $p < 0.05$ , \*\* $p < 0.01$ , \*\*\*\* $p < 0.0001$

696

697 **Figure 7. SARS-CoV-2 viral protein expression and macrophage infiltration is reduced by oral**  
698 **administration of PT150.** Viral load was determined by immunofluorescence staining of the SARS-CoV-  
699 2 nucleocapsid protein. Total viral replication and immune cell infiltration is seen within lung sections at  
700 the 3DPI, 5DPI, and 7DPI timepoints. **A-F**, SARS-CoV-2+Vehicle; **G-L**, SARS-CoV-2+30 mg/Kg/day  
701 PT150; **M-R**, SARS-CoV-2+100mg/Kg/day PT150; **S-T**, Control + Vehicle. Quantification of percent  
702 SARS-CoV-2 infected tissue (**U**) and infiltrating macrophages (**V**) was performed using adaptive intensity  
703 thresholding and cellular co-localization of protein expression. N=6 animals per group with a sampling of  
704 5 lobes of tissue per animal. Differences were determined by one-way ANOVA, \* $p < 0.03$ , \*\* $p < 0.002$ ,  
705 \*\*\* $p < 0.0002$ , \*\*\*\* $p < 0.0001$ . ##### $p < 0.0001$  compared to control.

706

707 **Figure 8. PT150 treatment decreases expression of the inflammatory cytokine Interleukin-6 (IL-6) in**  
708 **lung following infection with SARS-CoV-2.** There was a significant decrease in expression of TMPRSS2  
709 in bronchiolar epithelial cells of Syrian golden hamsters infected with SARS-CoV-2 at all timepoints in  
710 animals given PT150 at 30 and 100 mg/Kg/day. Experimental groups were (A-C) SARS-CoV-2 + vehicle,  
711 (D-F), SARS-CoV-2 + 30 mg/Kg/day PT150, (G-I) SARS-CoV-2 + 100 mg/Kg/day PT150, (J) Control +  
712 vehicle. K, Quantification of IL-6 protein expression in lung tissue. \* $p < 0.05$ , \*\* $p < 0.01$ , \*\*\*\* $p < 0.0001$

713

Figure 1

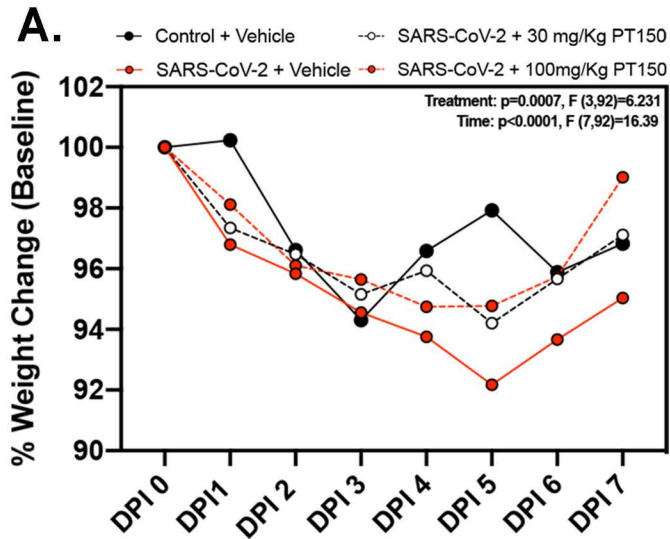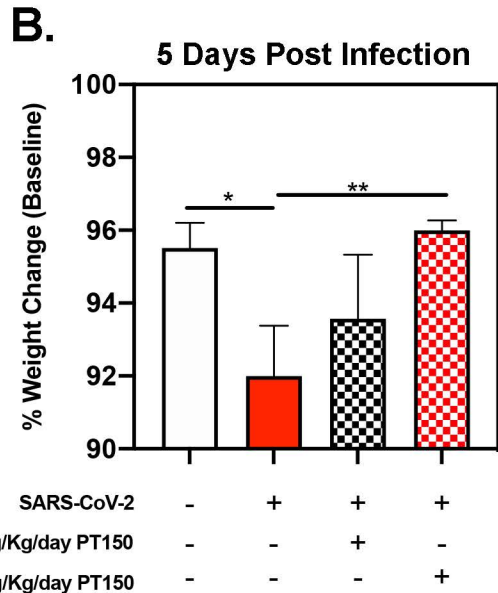



Figure 2

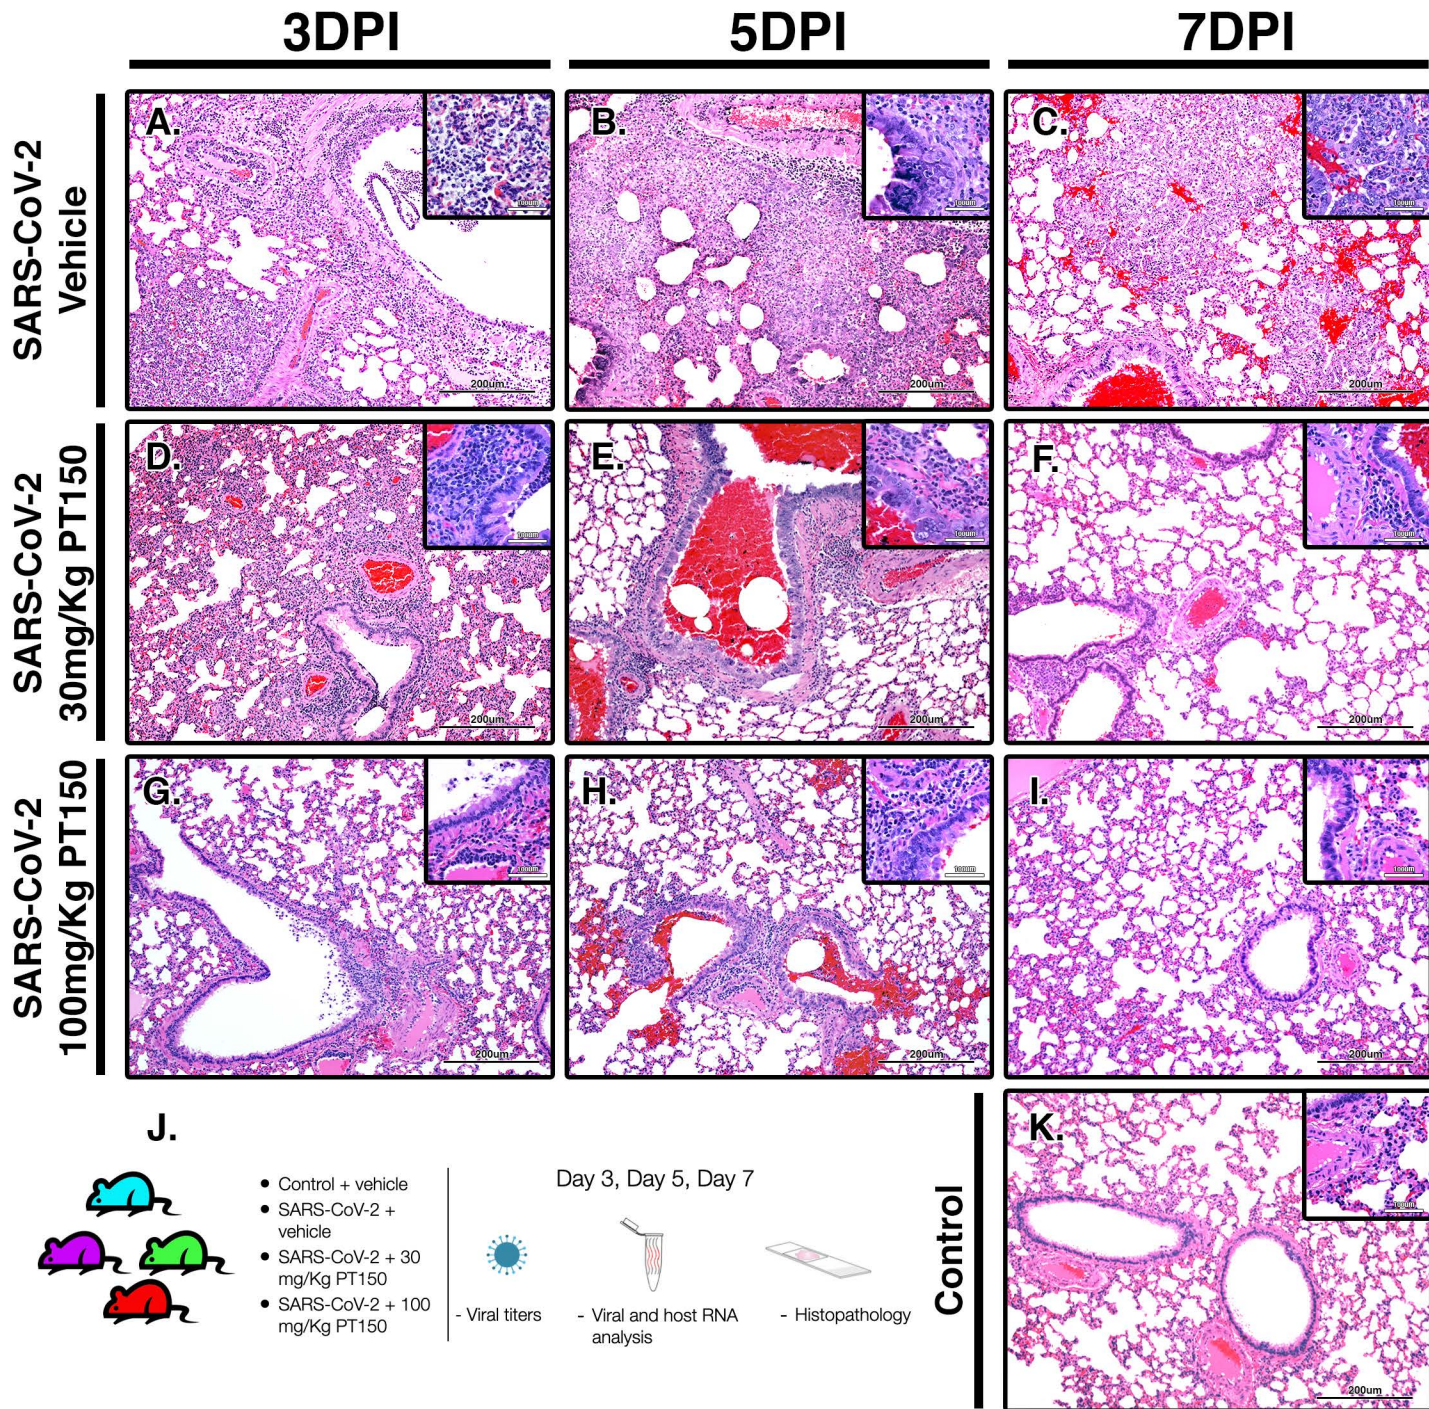



Figure 3

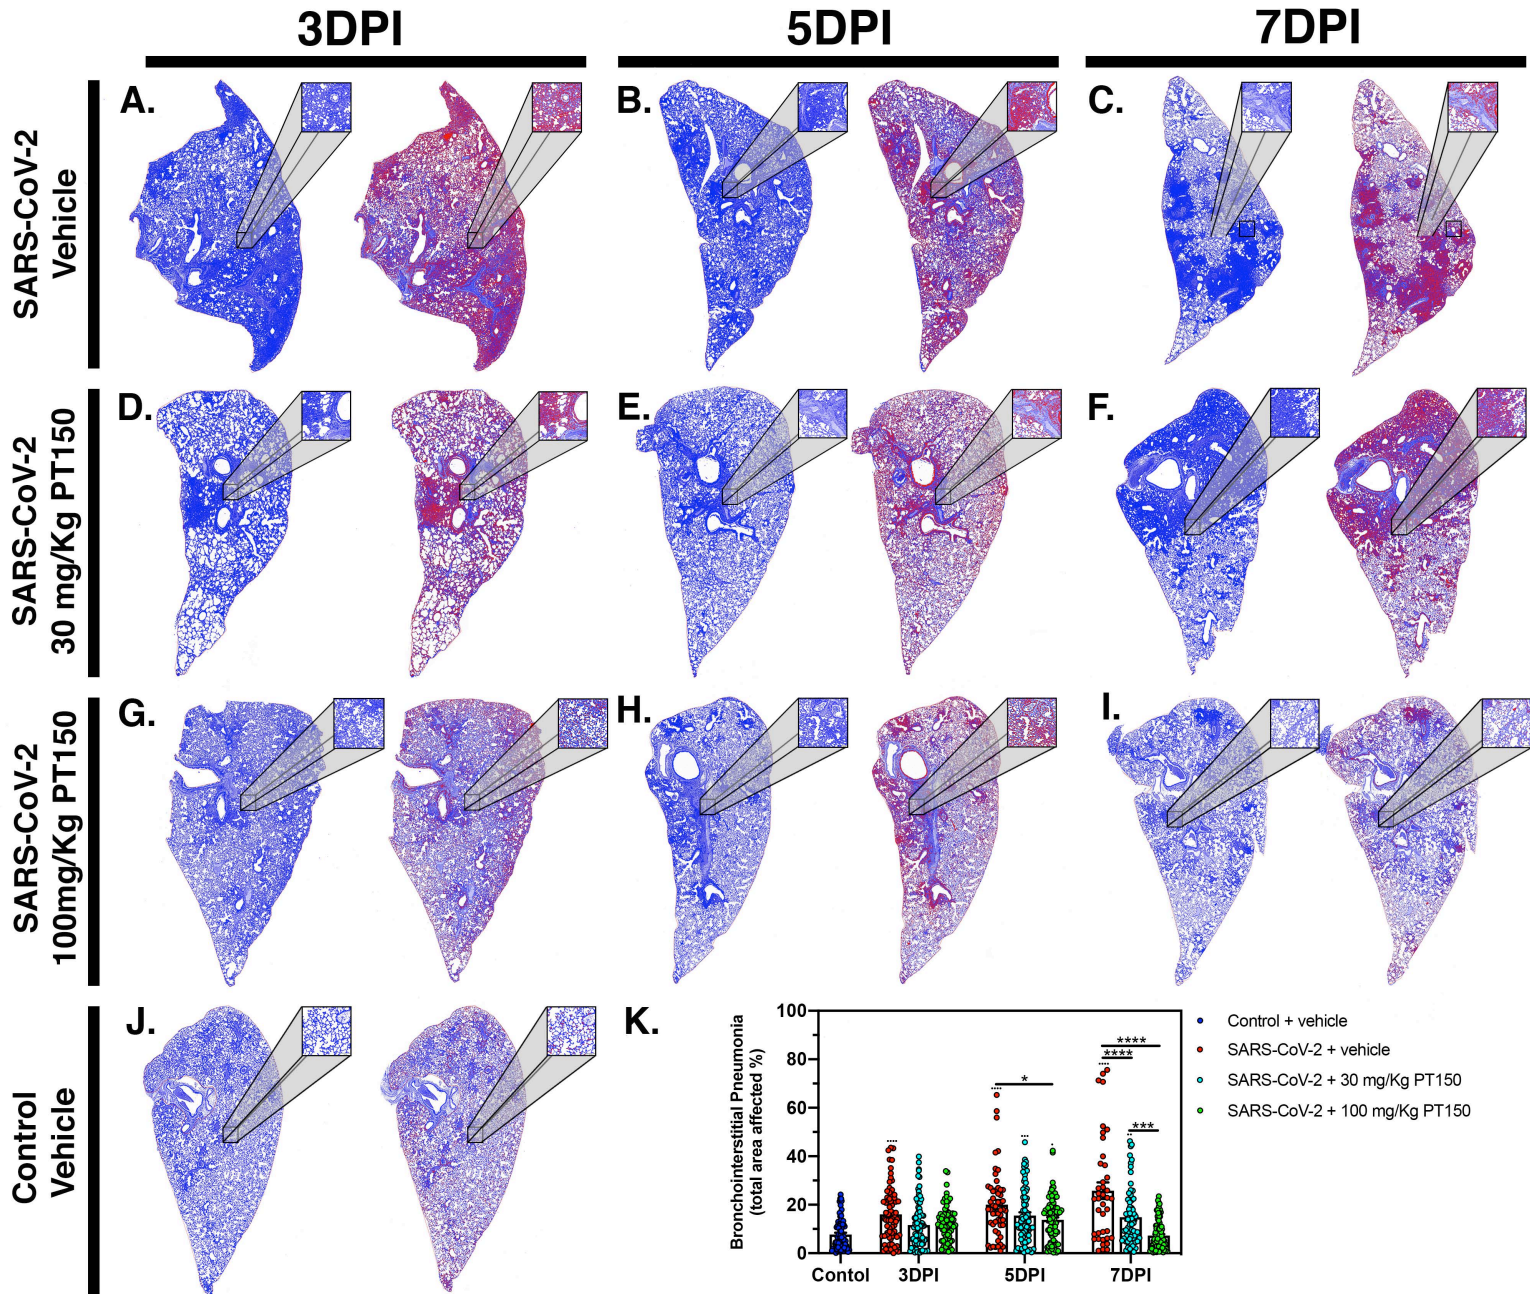

**Figure 4**

**A.**

**Androgen Receptor (AR)**

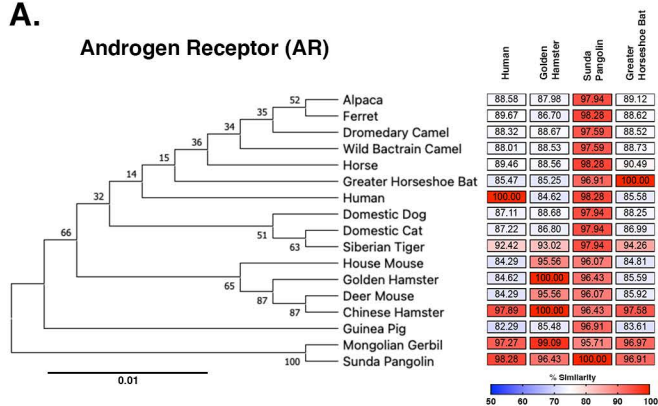

**B.**

**Glucocorticoid Receptor (GR)**

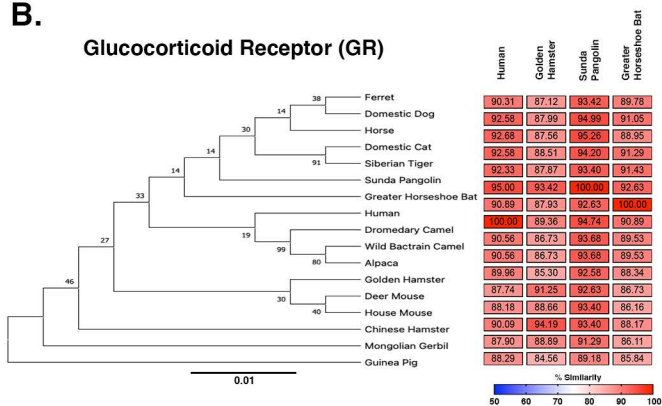

**PT150 Binding Androgen Receptor**

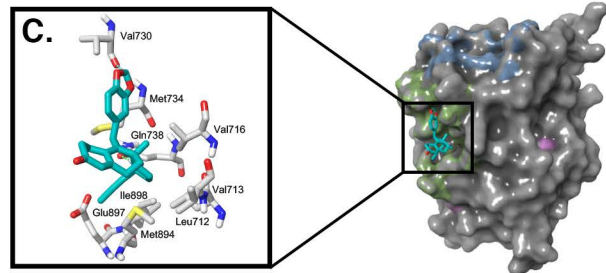

**PT150 Binding Androgen Receptor**

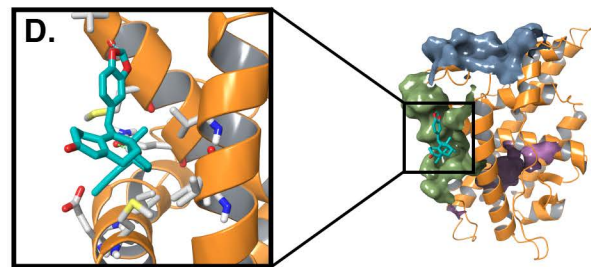

**PT150 Binding Glucocorticoid Receptor**

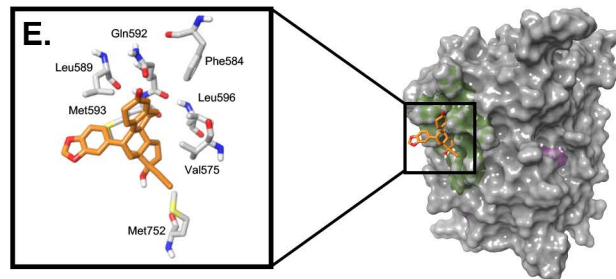

**PT150 Binding Glucocorticoid Receptor**

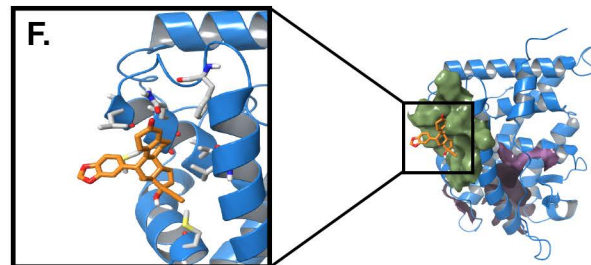



**Figure 5**

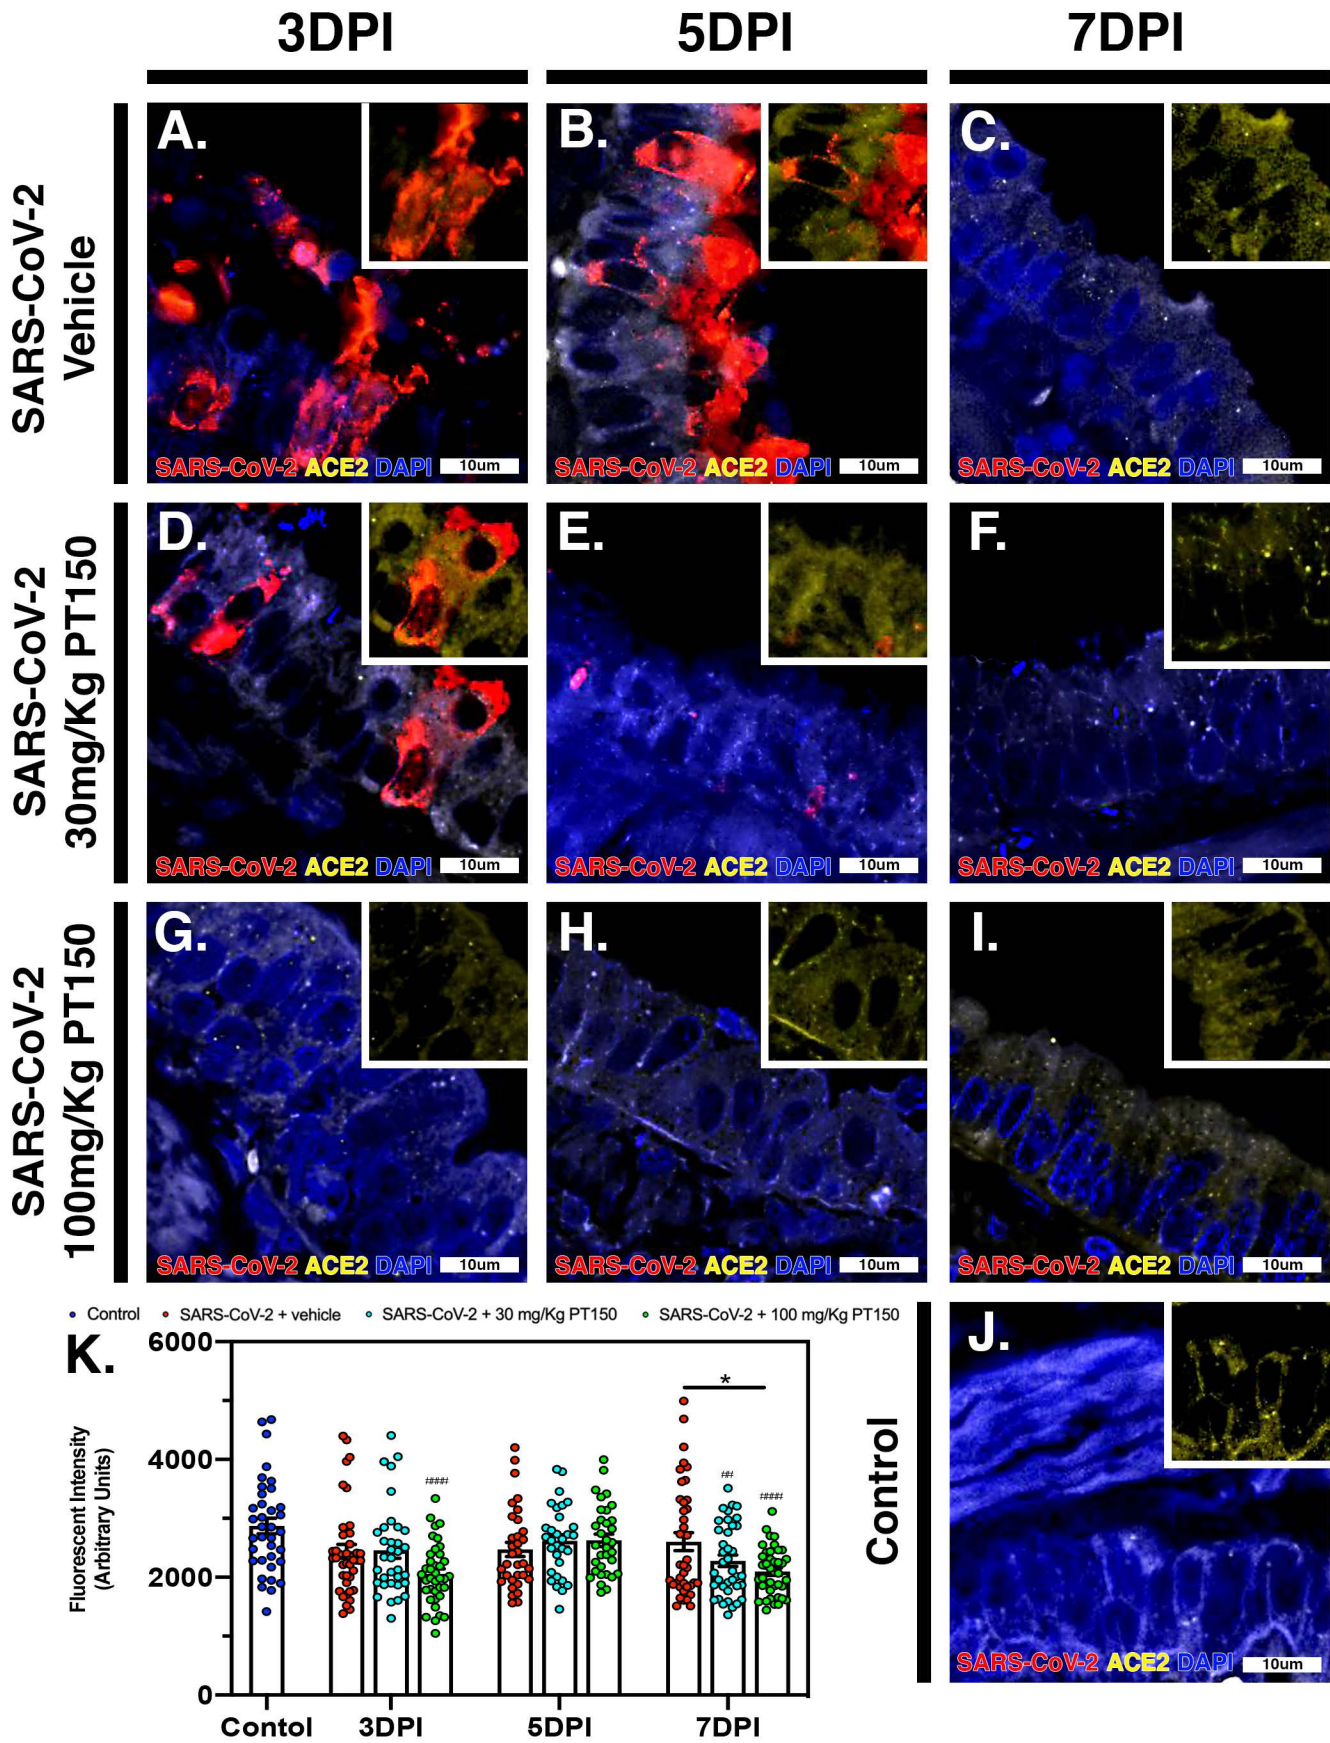





**Figure 7**

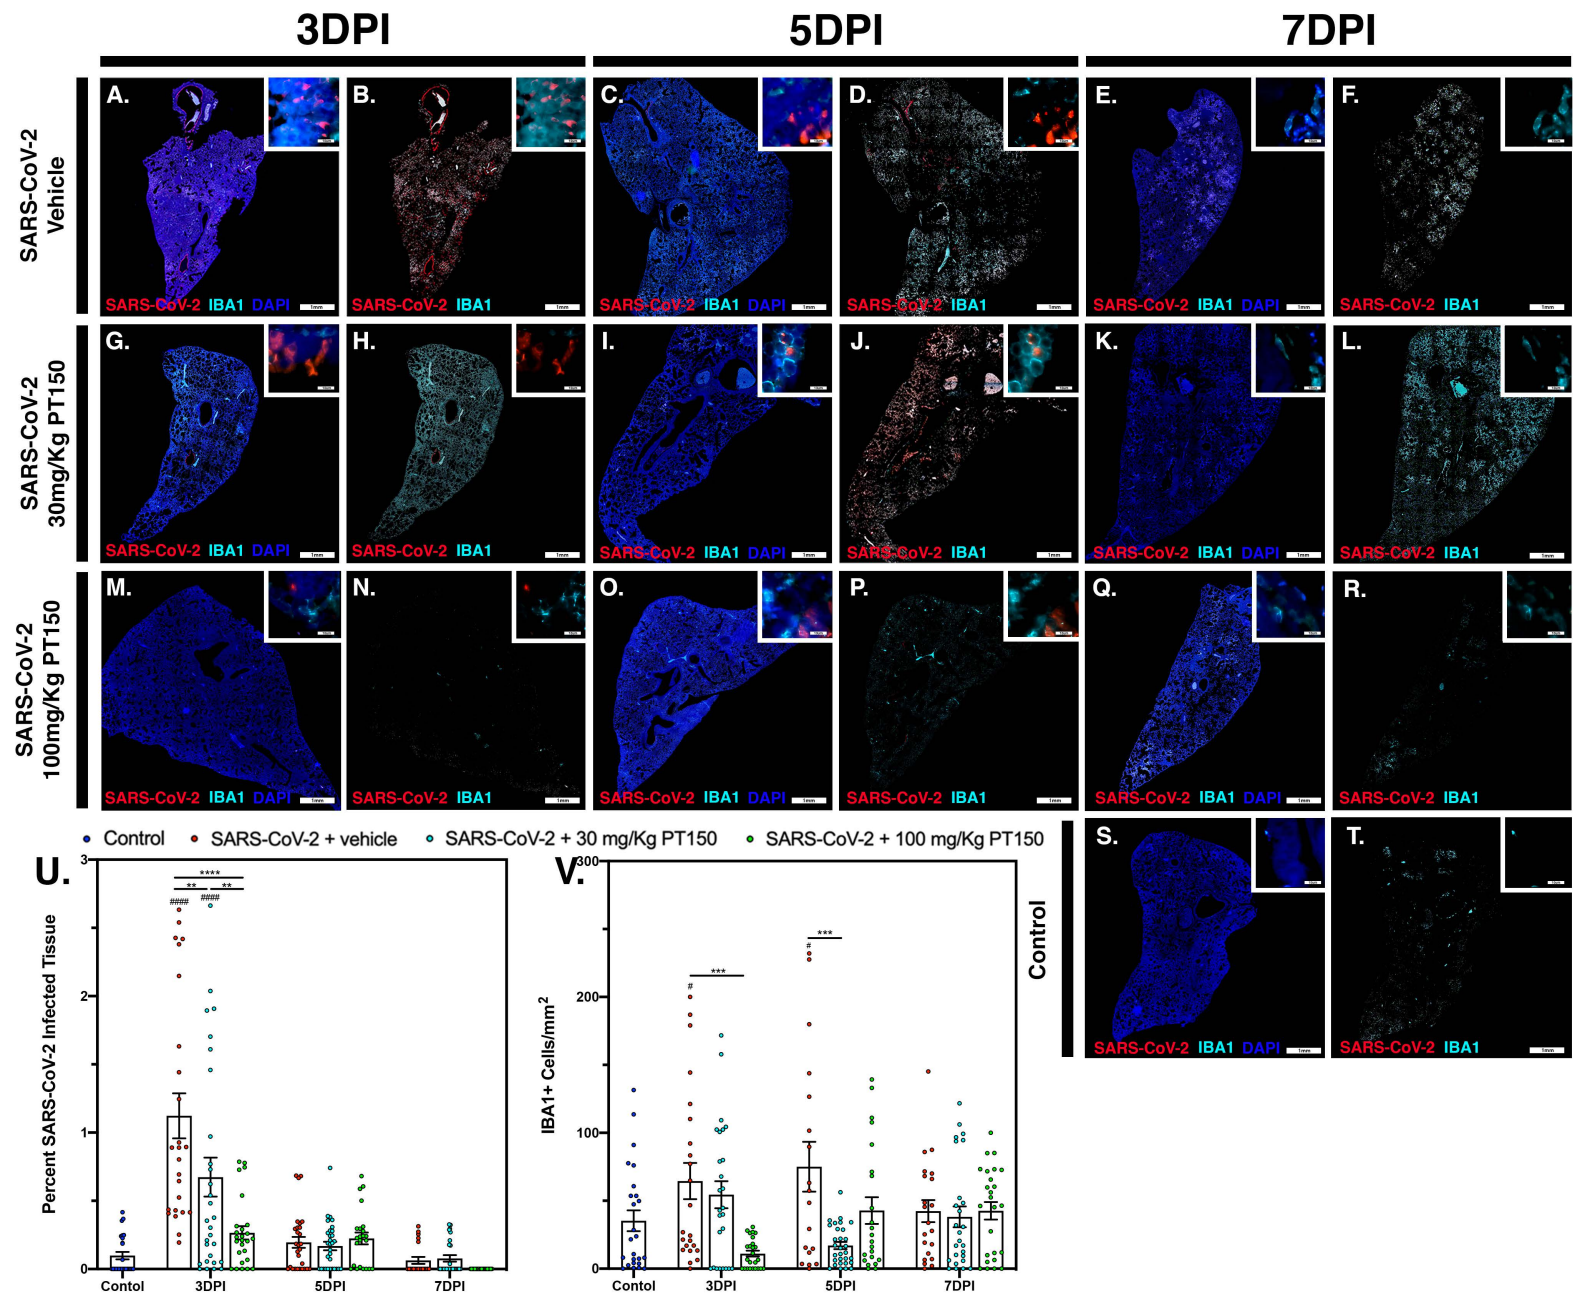



**Figure 8**

**3DPI**

**5DPI**

**7DPI**

**SARS-CoV-2  
Vehicle**

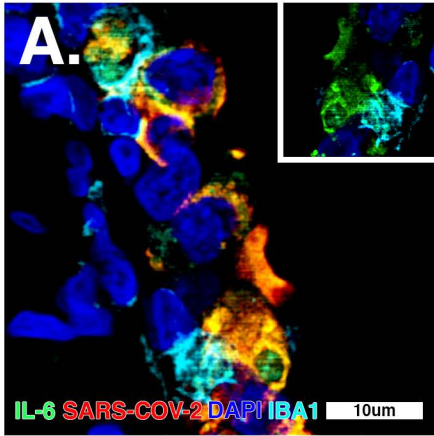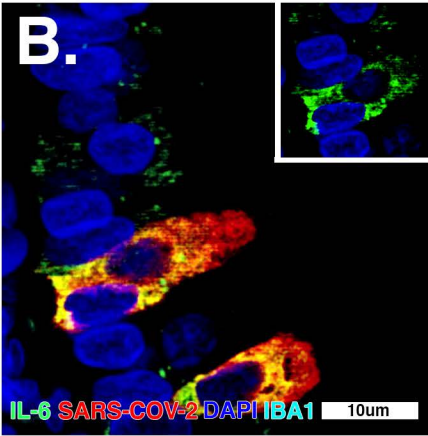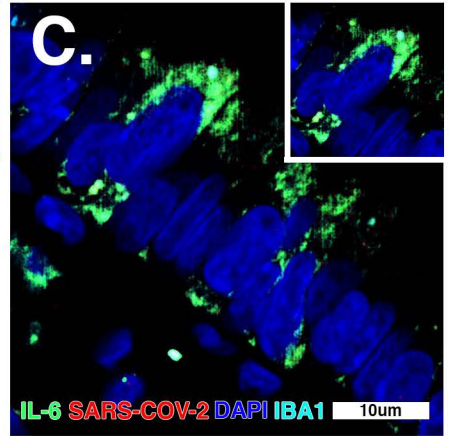

**SARS-CoV-2  
30mg/Kg PT150**

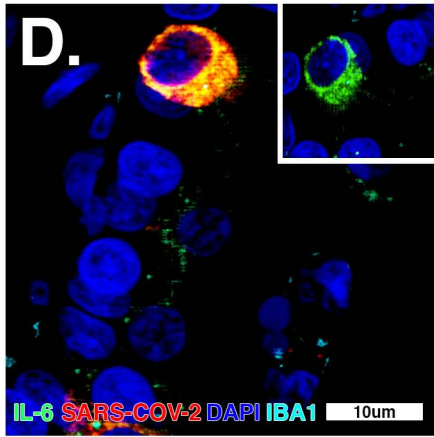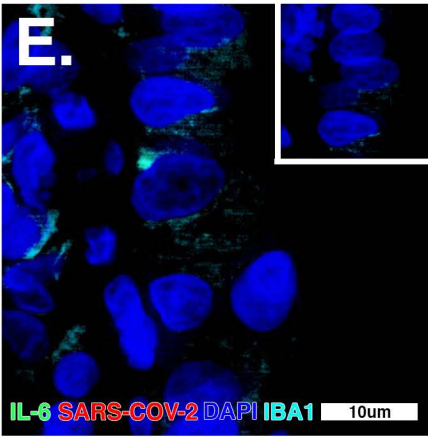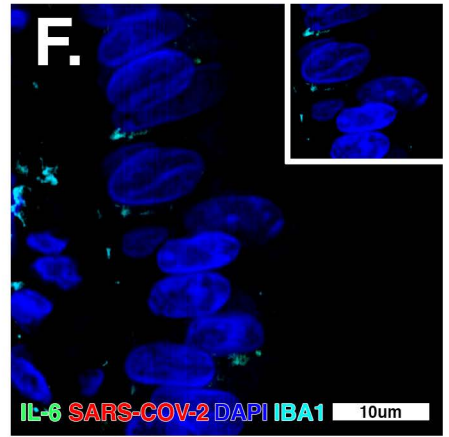

**SARS-CoV-2  
100mg/Kg PT150**

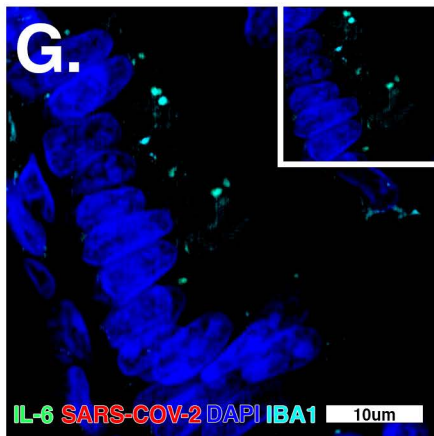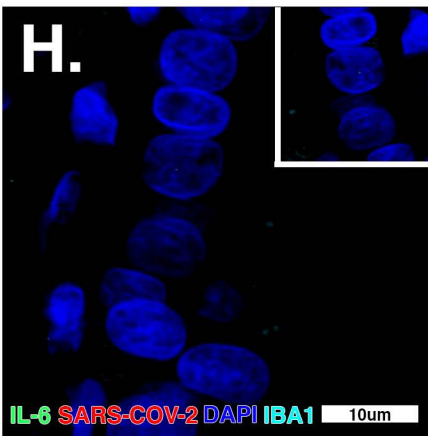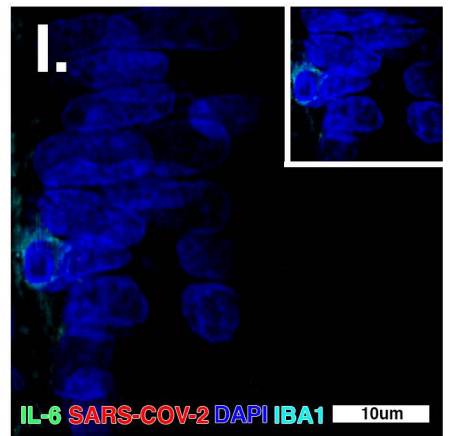

**K.**

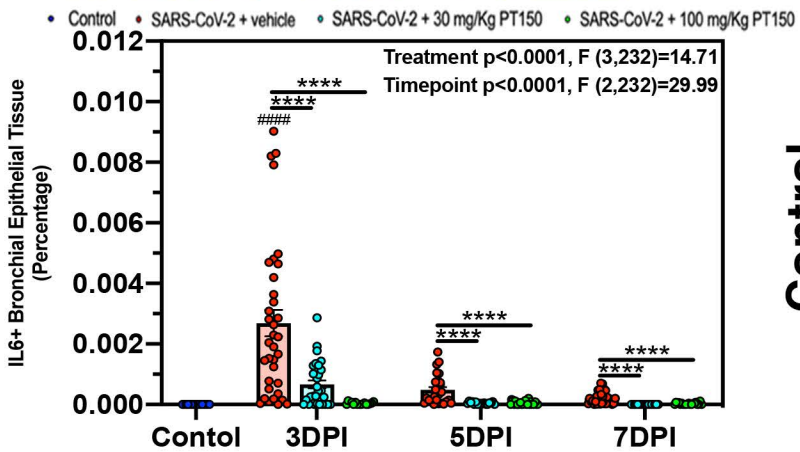

**Control**

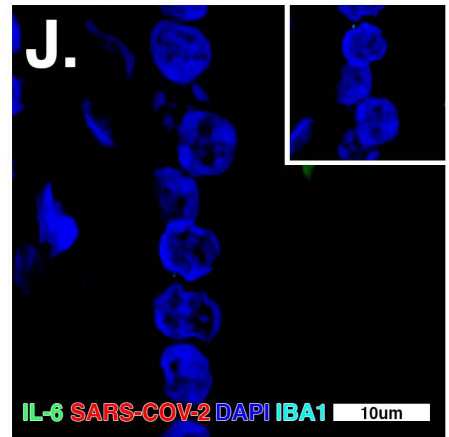

Source: https://www.biorxiv.org/content/10.1101/2021.02.20.432110v1.full.pdf
